# Supplementary material
Source: PubMed Central journal article supplement (PMC7703221)
Supplement: mmc1.pdf [file mmc1.pdf]

## Online Appendix

### Supplementary Tables

**Table A1 - Dates of COVID-19 Interventions  
Western European Countries**

| Country        | Lockdown announced | Full lockdown effective | Partial lockdown effective |
|----------------|--------------------|-------------------------|----------------------------|
| Austria        | March 15th         | March 16th              |                            |
| Belgium        | March 17th         | March 18th              |                            |
| France         | March 16th         | March 17th              |                            |
| Germany        | March 16th         |                         | March 22nd                 |
| Ireland        | March 28th         | March 28th              |                            |
| Italy          | March 9th          | March 10th              |                            |
| Luxembourg     | March 12th         | March 16th              |                            |
| Netherlands    | March 16th         |                         | March 16th                 |
| Portugal       | March 19th         | March 19th              |                            |
| Spain          | March 14th         | March 14th              |                            |
| Switzerland    | March 20th         |                         | March 20th                 |
| United Kingdom | March 23rd         | March 24th              |                            |

**Table A1 (cont.) - Dates of COVID-19 Interventions  
United States**

| State                | Lockdown announced | Lockdown effective | 1st city/county lockdown effective |
|----------------------|--------------------|--------------------|------------------------------------|
| Alabama              | April 3rd          | April 4th          | March 23rd                         |
| Alaska               | March 27th         | March 28th         | March 23rd                         |
| Arizona              | March 30th         | March 31st         | March 30th                         |
| California           | March 19th         | March 19th         | March 16th                         |
| Colorado             | March 25th         | March 26th         | March 18th                         |
| Connecticut          | March 20th         | March 23rd         | March 20th                         |
| Delaware             | March 22nd         | March 24th         | March 22nd                         |
| District of Columbia | March 30th         | April 1st          | March 30th                         |
| Florida              | April 1st          | April 3rd          | March 23rd                         |
| Georgia              | April 1st          | April 3rd          | March 19th                         |
| Hawaii               | March 23rd         | March 25th         | March 22nd                         |
| Idaho                | March 25th         | March 25th         | March 17th                         |
| Illinois             | March 20th         | March 21st         | March 20th                         |
| Indiana              | March 23rd         | March 24th         | March 23rd                         |
| Kansas               | March 28th         | March 30th         | March 22nd                         |
| Kentucky             | March 23rd         | March 26th         | March 23rd                         |
| Louisiana            | March 22nd         | March 23rd         | March 20th                         |
| Maine                | March 31st         | April 2nd          | March 23rd                         |
| Maryland             | March 30th         | March 30th         | March 30th                         |
| Massachusetts        | March 23rd         | March 24th         | March 23rd                         |
| Michigan             | March 23rd         | March 24th         | March 23rd                         |
| Minnesota            | March 26th         | March 27th         | March 26th                         |
| Mississippi          | April 1st          | April 3rd          | March 21st                         |
| Missouri             | April 3rd          | April 6th          | March 22nd                         |
| Montana              | March 26th         | March 28th         | March 26th                         |
| Nevada               | April 1st          | April 1st          | April 1st                          |
| New Hampshire        | March 26th         | March 27th         | March 26th                         |
| New Jersey           | March 21st         | March 21st         | March 21st                         |
| New Mexico           | March 23rd         | March 23rd         | March 23rd                         |
| New York             | March 20th         | March 22nd         | March 17th                         |
| North Carolina       | March 27th         | March 30th         | March 24th                         |
| Ohio                 | March 22nd         | March 23rd         | March 22nd                         |
| Oregon               | March 23rd         | March 23rd         | March 22nd                         |
| Pennsylvania         | March 23rd         | April 1st          | March 23rd                         |
| Rhode Island         | March 28th         | March 28th         | March 28th                         |
| South Carolina       | April 6th          | April 7th          | March 25th                         |
| Tennessee            | March 30th         | March 31st         | March 23rd                         |
| Texas                | March 31st         | April 2nd          | March 22nd                         |
| Vermont              | March 24th         | March 25th         | March 24th                         |
| Virginia             | March 30th         | March 30th         | March 30th                         |
| Washington           | March 23rd         | March 23rd         | March 23rd                         |
| West Virginia        | March 23rd         | March 24th         | March 23rd                         |
| Wisconsin            | March 24th         | March 25th         | March 23rd                         |

**Table A2 - The Effects of Stay-at-Home-Orders - Implementation Date  
Western European Countries**

**Panel A**

|                                     | Boredom            | Contentment    | Divorce             | Impairment       |
|-------------------------------------|--------------------|----------------|---------------------|------------------|
| T <sub>i,c</sub> *Year <sub>i</sub> | 21.17***<br>(2.84) | 2.22<br>(3.95) | -10.45***<br>(2.02) | -5.85*<br>(3.34) |
| Country FE                          | Yes                | Yes            | Yes                 | Yes              |
| Year, Week and Day FE               | Yes                | Yes            | Yes                 | Yes              |
| Death                               | Yes                | Yes            | Yes                 | Yes              |
| Observations                        | 2019               | 1599           | 2219                | 901              |

**Panel B**

|                                     | Irritability     | Loneliness         | Panic           | Sadness        |
|-------------------------------------|------------------|--------------------|-----------------|----------------|
| T <sub>i,c</sub> *Year <sub>i</sub> | -9.02*<br>(4.73) | 11.49***<br>(2.76) | -2.77<br>(2.90) | 2.73<br>(2.40) |
| Country FE                          | Yes              | Yes                | Yes             | Yes            |
| Year, Week and Day FE               | Yes              | Yes                | Yes             | Yes            |
| Death                               | Yes              | Yes                | Yes             | Yes            |
| Observations                        | 841              | 1977               | 2003            | 2203           |

**Panel C**

|                                     | Sleep               | Stress             | Suicide             | Wellbeing           | Worry              |
|-------------------------------------|---------------------|--------------------|---------------------|---------------------|--------------------|
| T <sub>i,c</sub> *Year <sub>i</sub> | -10.60***<br>(2.45) | -7.72***<br>(2.75) | -12.72***<br>(2.74) | -22.53***<br>(3.29) | 10.36***<br>(3.57) |
| Country FE                          | Yes                 | Yes                | Yes                 | Yes                 | Yes                |
| Year, Week and Day FE               | Yes                 | Yes                | Yes                 | Yes                 | Yes                |
| Death                               | Yes                 | Yes                | Yes                 | Yes                 | Yes                |
| Observations                        | 2333                | 2226               | 2244                | 1921                | 1689               |

Notes: Table A2 shows differences-in-differences estimates using the date of implementation, instead of the announcement date. The models include controls for a dummy that takes value 1 in the days after the stay-at-home order was implemented, as well as country, year, week, day fixed effects and the one-day lagged number of new deaths from Covid-19 per million. Weights are applied. Robust standard errors are in parentheses. Standard errors are clustered at the day level.

**Table A2 (cont.) - The Effects of Stay-at-Home-Orders - Implementation Date  
United States**

**Panel A**

|                                     | Boredom            | Contentment        | Divorce            | Impairment     |
|-------------------------------------|--------------------|--------------------|--------------------|----------------|
| T <sub>i,c</sub> *Year <sub>i</sub> | 19.73***<br>(2.32) | -9.80***<br>(3.08) | -5.93***<br>(2.15) | 9.57<br>(6.01) |
| State FE                            | Yes                | Yes                | Yes                | Yes            |
| Year, Week and Day FE               | Yes                | Yes                | Yes                | Yes            |
| Death                               | Yes                | Yes                | Yes                | Yes            |
| Observations                        | 6871               | 2473               | 9049               | 741            |

**Panel B**

|                                     | Irritability      | Loneliness        | Panic          | Sadness         |
|-------------------------------------|-------------------|-------------------|----------------|-----------------|
| T <sub>i,c</sub> *Year <sub>i</sub> | -10.67*<br>(6.34) | 6.46***<br>(2.35) | 0.71<br>(2.00) | 2.93*<br>(1.61) |
| State FE                            | Yes               | Yes               | Yes            | Yes             |
| Year, Week and Day FE               | Yes               | Yes               | Yes            | Yes             |
| Death                               | Yes               | Yes               | Yes            | Yes             |
| Observations                        | 1846              | 4311              | 6727           | 8387            |

**Panel C**

|                                     | Sleep           | Stress             | Suicide           | Wellbeing          | Worry          |
|-------------------------------------|-----------------|--------------------|-------------------|--------------------|----------------|
| T <sub>i,c</sub> *Year <sub>i</sub> | -0.97<br>(1.21) | -6.21***<br>(2.23) | -5.16**<br>(2.41) | 10.19***<br>(3.03) | 1.25<br>(1.87) |
| State FE                            | Yes             | Yes                | Yes               | Yes                | Yes            |
| Year, Week and Day FE               | Yes             | Yes                | Yes               | Yes                | Yes            |
| Death                               | Yes             | Yes                | Yes               | Yes                | Yes            |
| Observations                        | 9445            | 6027               | 9029              | 3159               | 5938           |

Notes: Table A2 shows differences-in-differences estimates using the date of implementation, instead of the announcement date. The models include controls for a dummy that takes value 1 in the days after the stay-at-home order was implemented, as well as State, year, week, day fixed effects and the one-day lagged number of new deaths from Covid-19 per million. Weights are applied. Robust standard errors are in parentheses. Standard errors are clustered at the day level.

**Table A3 - Duration of the Effect of the Stay-At-Home-Orders  
Western European Countries**

**Panel A**

|                       | Boredom             | Contentment      | Divorce             | Impairment         |
|-----------------------|---------------------|------------------|---------------------|--------------------|
| 3 weeks before*2020   | 0.41<br>(3.06)      | -4.03<br>(5.19)  | 0.35<br>(3.68)      | -1.13<br>(13.41)   |
| 2 weeks before*2020   | -1.68<br>(3.64)     | -3.59<br>(5.36)  | 0.18<br>(3.71)      | -11.41<br>(10.20)  |
| 1 week before*2020    | 3.27<br>(4.45)      | -9.22*<br>(4.76) | -6.37*<br>(3.61)    | -18.93*<br>(10.08) |
| Week of lockdown*2020 | 23.88***<br>(7.84)  | -7.18<br>(5.11)  | -7.99**<br>(3.85)   | -21.02**<br>(8.91) |
| 1 week after*2020     | 35.54***<br>(5.07)  | -0.95<br>(7.05)  | -10.21**<br>(4.40)  | -12.02<br>(9.67)   |
| 2 weeks after*2020    | 35.09***<br>(5.30)  | 4.74<br>(5.77)   | -16.49***<br>(4.03) | -7.32<br>(9.97)    |
| 3 weeks after*2020    | 33.58***<br>(6.17)  | 1.42<br>(6.51)   | -17.55***<br>(4.84) | -15.21<br>(11.34)  |
| 4 weeks after*2020    | 34.28***<br>(10.74) | 3.11<br>(7.56)   | -15.71**<br>(5.97)  | -15.15<br>(11.80)  |
| Country FE            | Yes                 | Yes              | Yes                 | Yes                |
| Year, Week and Day FE | Yes                 | Yes              | Yes                 | Yes                |
| Death                 | Yes                 | Yes              | Yes                 | Yes                |
| Observations          | 810                 | 617              | 902                 | 361                |

Notes: Table A3 shows event-study differences-in-differences estimates using the 2019 period as a counterfactual. The 4th week before the stay-at-home order (in 2019 or 2020) is the reference period. The models include dummies for the weeks before and after the stay-at-home order. The controls also include country, year, week and day of the week fixed effects as well as the one-day lagged number of new deaths from Covid-19 per million. Weights are applied. Robust standard errors are in parentheses. Standard errors are clustered at the day level.

**Table A3 (cont.) - Duration of the Effect of the Stay-At-Home-Orders  
Western European Countries**

**Panel B**

|                       | Irritability       | Loneliness         | Panic              | Sadness            |
|-----------------------|--------------------|--------------------|--------------------|--------------------|
| 3 weeks before*2020   | -11.14<br>(10.38)  | 4.50<br>(4.05)     | 5.20<br>(3.82)     | -0.21<br>(2.94)    |
| 2 weeks before*2020   | -13.47<br>(8.12)   | 7.67*<br>(4.35)    | 9.28*<br>(4.74)    | -2.25<br>(3.09)    |
| 1 week before*2020    | -16.33*<br>(8.78)  | 7.78*<br>(3.95)    | 13.59**<br>(6.02)  | -1.92<br>(2.94)    |
| Week of lockdown*2020 | -20.88**<br>(9.59) | 14.96***<br>(5.36) | 15.03***<br>(4.32) | -1.65<br>(3.15)    |
| 1 week after*2020     | -18.18*<br>(9.32)  | 14.10***<br>(3.98) | 2.36<br>(4.76)     | 2.55<br>(3.63)     |
| 2 weeks after*2020    | -15.90<br>(11.20)  | 9.26**<br>(3.59)   | 3.22<br>(4.91)     | 8.33*<br>(4.39)    |
| 3 weeks after*2020    | -9.91<br>(10.73)   | 5.30<br>(5.33)     | 10.26*<br>(5.17)   | 14.12***<br>(4.37) |
| 4 weeks after*2020    | -0.64<br>(21.45)   | 3.87<br>(5.14)     | 16.37*<br>(8.85)   | 2.04<br>(4.08)     |
| Country FE            | Yes                | Yes                | Yes                | Yes                |
| Year, Week and Day FE | Yes                | Yes                | Yes                | Yes                |
| Death                 | Yes                | Yes                | Yes                | Yes                |
| Observations          | 369                | 790                | 787                | 888                |

Notes: Table A3 shows event-study differences-in-differences estimates using the 2019 period as a counterfactual. The 4th week before the stay-at-home order (in 2019 or 2020) is the reference period. The models include dummies for the weeks before and after the stay-at-home order. The controls also include country, year, week and day of the week fixed effects as well as the one-day lagged number of new deaths from Covid-19 per million. Weights are applied. Robust standard errors are in parentheses. Standard errors are clustered at the day level.

**Table A3 (cont.) - Duration of the Effect of the Stay-At-Home-Orders  
Western European Countries**

**Panel C**

|                       | Sleep               | Stress              | Suicide             | Wellbeing            | Worry              |
|-----------------------|---------------------|---------------------|---------------------|----------------------|--------------------|
| 3 weeks before*2020   | -2.76<br>(1.94)     | -6.09<br>(3.96)     | -2.75<br>(3.73)     | -6.86<br>(5.51)      | 1.02<br>(4.50)     |
| 2 weeks before*2020   | -5.95**<br>(2.70)   | -7.94*<br>(4.71)    | -5.08<br>(3.54)     | -8.96<br>(6.89)      | 8.25<br>(5.38)     |
| 1 week before*2020    | -11.47***<br>(3.11) | -12.96***<br>(3.97) | -12.55***<br>(4.65) | -11.27*<br>(6.56)    | 12.86***<br>(4.74) |
| Week of lockdown*2020 | -18.72***<br>(3.26) | -14.92***<br>(4.42) | -17.94***<br>(4.71) | -16.64***<br>(6.03)  | 13.02**<br>(5.31)  |
| 1 week after*2020     | -17.62***<br>(3.51) | -12.52***<br>(4.26) | -15.16***<br>(4.61) | -21.41***<br>(6.43)  | 14.33***<br>(5.34) |
| 2 weeks after*2020    | -9.82**<br>(4.39)   | -5.80<br>(6.41)     | -21.14***<br>(5.79) | -20.57***<br>(7.72)  | 15.24**<br>(6.97)  |
| 3 weeks after*2020    | -5.21<br>(4.63)     | 7.09<br>(7.22)      | -18.94***<br>(6.65) | -28.63***<br>(9.30)  | 14.36<br>(9.11)    |
| 4 weeks after*2020    | -8.22*<br>(4.61)    | -2.26<br>(6.08)     | -13.38<br>(8.74)    | -30.33***<br>(10.86) | 14.12<br>(9.80)    |
| Country FE            | Yes                 | Yes                 | Yes                 | Yes                  | Yes                |
| Year, Week and Day FE | Yes                 | Yes                 | Yes                 | Yes                  | Yes                |
| Death                 | Yes                 | Yes                 | Yes                 | Yes                  | Yes                |
| Observations          | 965                 | 900                 | 908                 | 787                  | 670                |

Notes: Table A3 shows event-study differences-in-differences estimates using the 2019 period as a counterfactual. The 4th week before the stay-at-home order (in 2019 or 2020) is the reference period. The models include dummies for the weeks before and after the stay-at-home order. The controls also include country, year, week and day of the week fixed effects as well as the one-day lagged number of new deaths from Covid-19 per million. Weights are applied. Robust standard errors are in parentheses. Standard errors are clustered at the day level.

**Table A3 (cont.) - Duration of the Effect of the Stay-At-Home-Orders  
United States**

**Panel A**

|                       | Boredom            | Contentment        | Divorce             | Impairment        |
|-----------------------|--------------------|--------------------|---------------------|-------------------|
| 3 weeks before*2020   | 2.58<br>(3.33)     | -0.07<br>(5.68)    | -1.64<br>(2.10)     | -2.72<br>(17.26)  |
| 2 weeks before*2020   | 8.82**<br>(3.67)   | -4.58<br>(6.79)    | -4.75**<br>(1.91)   | -8.45<br>(16.17)  |
| 1 week before*2020    | 19.26***<br>(3.40) | -7.94<br>(6.12)    | -7.35***<br>(2.07)  | -3.24<br>(17.47)  |
| Week of lockdown*2020 | 22.87***<br>(2.73) | -1.02<br>(5.77)    | -9.10***<br>(1.94)  | 3.52<br>(16.82)   |
| 1 week after*2020     | 25.56***<br>(2.47) | -4.07<br>(6.15)    | -10.93***<br>(2.74) | 1.04<br>(18.13)   |
| 2 weeks after*2020    | 29.46***<br>(2.99) | 5.63<br>(8.35)     | -9.23<br>(5.86)     | -5.39<br>(16.60)  |
| 3 weeks after*2020    | 30.54***<br>(3.41) | 35.28**<br>(15.90) | -9.19<br>(8.72)     | -24.62<br>(20.86) |
| State FE              | Yes                | Yes                | Yes                 | Yes               |
| Year, Week and Day FE | Yes                | Yes                | Yes                 | Yes               |
| Death                 | Yes                | Yes                | Yes                 | Yes               |
| Observations          | 2743               | 1028               | 3363                | 325               |

Notes: Table A3 shows event-study differences-in-differences estimates using the 2019 period as a counterfactual. The 4th week before the stay-at-home order (in 2019 or 2020) is the reference period. The models include dummies for the weeks before and after the stay-at-home order. The controls also include State, year, week and day of the week fixed effects as well as the one-day lagged number of new deaths from Covid-19 per million. Weights are applied. Robust standard errors are in parentheses. Standard errors are clustered at the day level.



**Table A3 (cont.) - Duration of the Effect of the Stay-At-Home-Orders  
United States**

**Panel B**

|                       | Irritability       | Loneliness     | Panic              | Sadness            |
|-----------------------|--------------------|----------------|--------------------|--------------------|
| 3 weeks before*2020   | 0.40<br>(8.66)     | 4.10<br>(4.81) | 9.02**<br>(3.39)   | 2.65<br>(3.59)     |
| 2 weeks before*2020   | -4.92<br>(7.61)    | 4.09<br>(4.05) | 15.60***<br>(3.01) | 3.41<br>(2.47)     |
| 1 week before*2020    | 1.52<br>(7.91)     | 4.89<br>(5.92) | 15.60***<br>(4.30) | 2.17<br>(2.98)     |
| Week of lockdown*2020 | -1.58<br>(6.07)    | 8.53<br>(5.43) | 10.19**<br>(4.23)  | 2.16<br>(2.46)     |
| 1 week after*2020     | -11.67*<br>(6.28)  | 6.15<br>(4.65) | 4.44<br>(2.78)     | 4.65*<br>(2.77)    |
| 2 weeks after*2020    | -10.30<br>(8.25)   | 5.77<br>(4.67) | 6.27*<br>(3.53)    | 10.87***<br>(2.84) |
| 3 weeks after*2020    | -25.85*<br>(12.90) | 6.80<br>(6.96) | 5.28<br>(5.63)     | 18.32***<br>(3.98) |
| State FE              | Yes                | Yes            | Yes                | Yes                |
| Year, Week and Day FE | Yes                | Yes            | Yes                | Yes                |
| Death                 | Yes                | Yes            | Yes                | Yes                |
| Observations          | 784                | 1840           | 2710               | 3184               |

Notes: Table A3 shows event-study differences-in-differences estimates using the 2019 period as a counterfactual. The 4th week before the stay-at-home order (in 2019 or 2020) is the reference period. The models include dummies for the weeks before and after the stay-at-home order. The controls also include State, year, week and day of the week fixed effects as well as the one-day lagged number of new deaths from Covid-19 per million. Weights are applied. Robust standard errors are in parentheses. Standard errors are clustered at the day level.

**Table A3 (cont.) - Duration of the Effect of the Stay-At-Home-Orders  
United States**

**Panel C**

|                       | Sleep               | Stress             | Suicide          | Wellbeing         | Worry              |
|-----------------------|---------------------|--------------------|------------------|-------------------|--------------------|
| 3 weeks before*2020   | -2.66<br>(2.54)     | -0.18<br>(2.92)    | -1.49<br>(3.75)  | 3.38<br>(5.63)    | 5.68**<br>(2.63)   |
| 2 weeks before*2020   | -7.69***<br>(2.34)  | -3.64<br>(3.41)    | -3.60<br>(3.59)  | 3.37<br>(5.50)    | 11.41***<br>(3.75) |
| 1 week before*2020    | -10.15***<br>(2.30) | -8.59***<br>(2.98) | -7.30*<br>(3.74) | 2.62<br>(5.40)    | 12.45***<br>(3.60) |
| Week of lockdown*2020 | -6.51**<br>(2.62)   | 1.73<br>(3.14)     | -7.17*<br>(4.17) | 5.45<br>(6.48)    | 7.49**<br>(3.27)   |
| 1 week after*2020     | -2.36<br>(2.30)     | 0.18<br>(3.33)     | -3.53<br>(3.78)  | 15.06**<br>(6.65) | 8.04**<br>(3.99)   |
| 2 weeks after*2020    | 1.83<br>(2.73)      | -4.57<br>(4.63)    | 1.30<br>(3.58)   | 10.45<br>(8.48)   | 5.77<br>(5.70)     |
| 3 weeks after*2020    | 5.52<br>(3.93)      | -4.73<br>(7.87)    | 1.42<br>(4.45)   | 7.66<br>(10.66)   | 7.53<br>(9.12)     |
| State FE              | Yes                 | Yes                | Yes              | Yes               | Yes                |
| Year, Week and Day FE | Yes                 | Yes                | Yes              | Yes               | Yes                |
| Death                 | Yes                 | Yes                | Yes              | Yes               | Yes                |
| Observations          | 3479                | 2398               | 3365             | 1442              | 2483               |

Notes: Table A3 shows event-study differences-in-differences estimates using the 2019 period as a counterfactual. The 4th week before the stay-at-home order (in 2019 or 2020) is the reference period. The models include dummies for the weeks before and after the stay-at-home order. The controls also include State, year, week and day of the week fixed effects as well as the one-day lagged number of new deaths from Covid-19 per million. Weights are applied. Robust standard errors are in parentheses. Standard errors are clustered at the day level.

**Table A4 - The Effects of Stay-at-Home-Orders - RDD-DiD Estimates  
Western European Countries**

**Panel A**

|                                     | Boredom            | Contentment    | Divorce         | Impairment     |
|-------------------------------------|--------------------|----------------|-----------------|----------------|
| T <sub>i,c</sub> *Year <sub>i</sub> | 32.11***<br>(5.74) | 3.64<br>(6.60) | -3.00<br>(3.44) | 7.75<br>(5.49) |
| Country FE                          | Yes                | Yes            | Yes             | Yes            |
| Year, Week and Day FE               | Yes                | Yes            | Yes             | Yes            |
| Death                               | Yes                | Yes            | Yes             | Yes            |
| Observations                        | 1441               | 1078           | 1624            | 643            |

**Panel B**

|                                     | Irritability    | Loneliness     | Panic               | Sadness        |
|-------------------------------------|-----------------|----------------|---------------------|----------------|
| T <sub>i,c</sub> *Year <sub>i</sub> | -5.10<br>(8.04) | 5.71<br>(3.95) | -18.23***<br>(5.96) | 2.65<br>(3.47) |
| Country FE                          | Yes             | Yes            | Yes                 | Yes            |
| Year, Week and Day FE               | Yes             | Yes            | Yes                 | Yes            |
| Death                               | Yes             | Yes            | Yes                 | Yes            |
| Observations                        | 679             | 1422           | 1445                | 1615           |

**Panel C**

|                                     | Sleep               | Stress          | Suicide         | Wellbeing       | Worry          |
|-------------------------------------|---------------------|-----------------|-----------------|-----------------|----------------|
| T <sub>i,c</sub> *Year <sub>i</sub> | -15.03***<br>(3.08) | -1.69<br>(3.54) | -0.96<br>(2.80) | -7.71<br>(5.51) | 3.49<br>(4.09) |
| Country FE                          | Yes                 | Yes             | Yes             | Yes             | Yes            |
| Year, Week and Day FE               | Yes                 | Yes             | Yes             | Yes             | Yes            |
| Death                               | Yes                 | Yes             | Yes             | Yes             | Yes            |
| Observations                        | 1745                | 1638            | 1653            | 1418            | 1193           |

Notes: Table A4 shows regression discontinuity estimates combined with differences-in-differences. The models include separate linear trends for the days elapsed before and after the stay-at-home order was announced, and these are also fully interacted with the year of the stay-at-home order. The controls include country, year, week and day of the week fixed effects as well as the one-day lagged number of new deaths from Covid-19 per million. Weights are applied. Robust standard errors are in parentheses. Standard errors are clustered at the day level.

**Table A4 (cont.) - The Effects of Stay-at-Home-Orders - RDD-DiD Estimates  
United States**

**Panel A**

|                                     | Boredom            | Contentment     | Divorce            | Impairment         |
|-------------------------------------|--------------------|-----------------|--------------------|--------------------|
| T <sub>i,c</sub> *Year <sub>i</sub> | 15.46***<br>(3.66) | -5.39<br>(6.31) | -8.32***<br>(2.30) | 21.16**<br>(10.34) |
| State FE                            | Yes                | Yes             | Yes                | Yes                |
| Year, Week and Day FE               | Yes                | Yes             | Yes                | Yes                |
| Death                               | Yes                | Yes             | Yes                | Yes                |
| Observations                        | 6058               | 2369            | 7643               | 723                |

**Panel B**

|                                     | Irritability    | Loneliness     | Panic               | Sadness        |
|-------------------------------------|-----------------|----------------|---------------------|----------------|
| T <sub>i,c</sub> *Year <sub>i</sub> | -1.76<br>(6.45) | 2.02<br>(4.88) | -12.19***<br>(4.34) | 2.68<br>(1.96) |
| State FE                            | Yes             | Yes            | Yes                 | Yes            |
| Year, Week and Day FE               | Yes             | Yes            | Yes                 | Yes            |
| Death                               | Yes             | Yes            | Yes                 | Yes            |
| Observations                        | 1777            | 4026           | 5983                | 7223           |

**Panel C**

|                                     | Sleep           | Stress         | Suicide         | Wellbeing       | Worry           |
|-------------------------------------|-----------------|----------------|-----------------|-----------------|-----------------|
| T <sub>i,c</sub> *Year <sub>i</sub> | -2.35<br>(2.26) | 0.93<br>(3.53) | -5.27<br>(4.24) | 10.10<br>(6.25) | -4.09<br>(4.86) |
| State FE                            | Yes             | Yes            | Yes             | Yes             | Yes             |
| Year, Week and Day FE               | Yes             | Yes            | Yes             | Yes             | Yes             |
| Death                               | Yes             | Yes            | Yes             | Yes             | Yes             |
| Observations                        | 7902            | 5471           | 7638            | 3015            | 5386            |

Notes: Table A4 shows regression discontinuity estimates combined with differences-in-differences. The models include linear controls for the days elapsed before or after the stay-at-home order was announced, and these are also fully interacted with the year of the stay-at-home order. The controls include State, year, week and day of the week fixed effects as well as the one-day lagged number of new deaths from Covid-19 per million. Weights are applied. Robust standard errors are in parentheses. Standard errors are clustered at the day level.

Supplementary Figures

Western European Countries

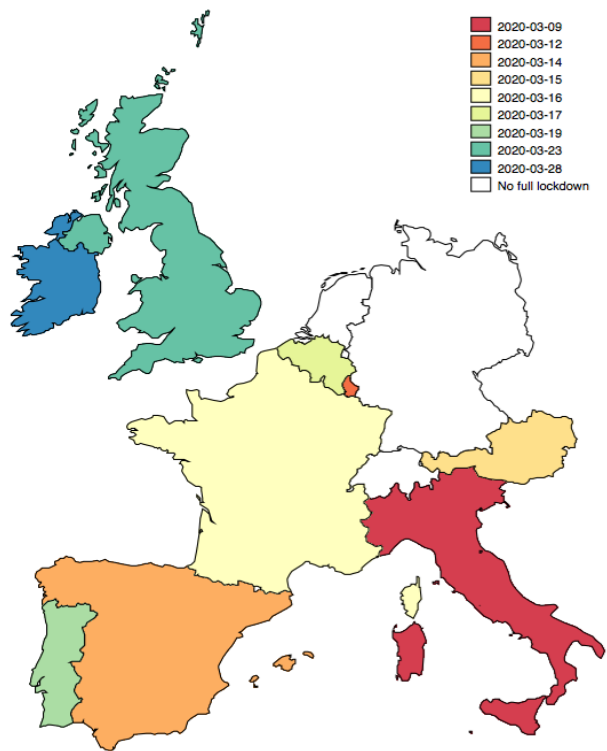

United States

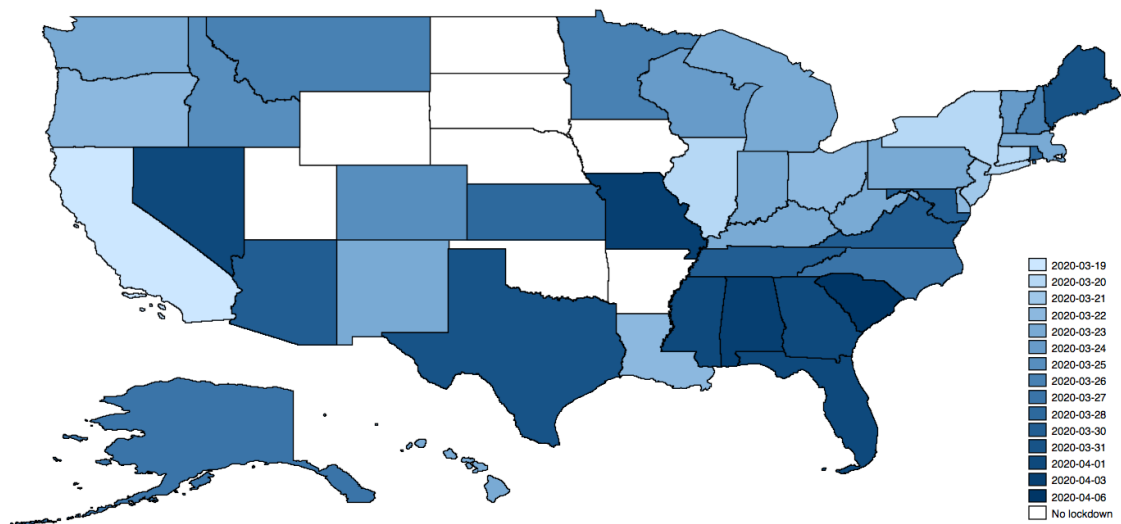

Fig. A1 - Announcement Dates of the Stay-at-home Orders - As of April 10th

## Western European Countries

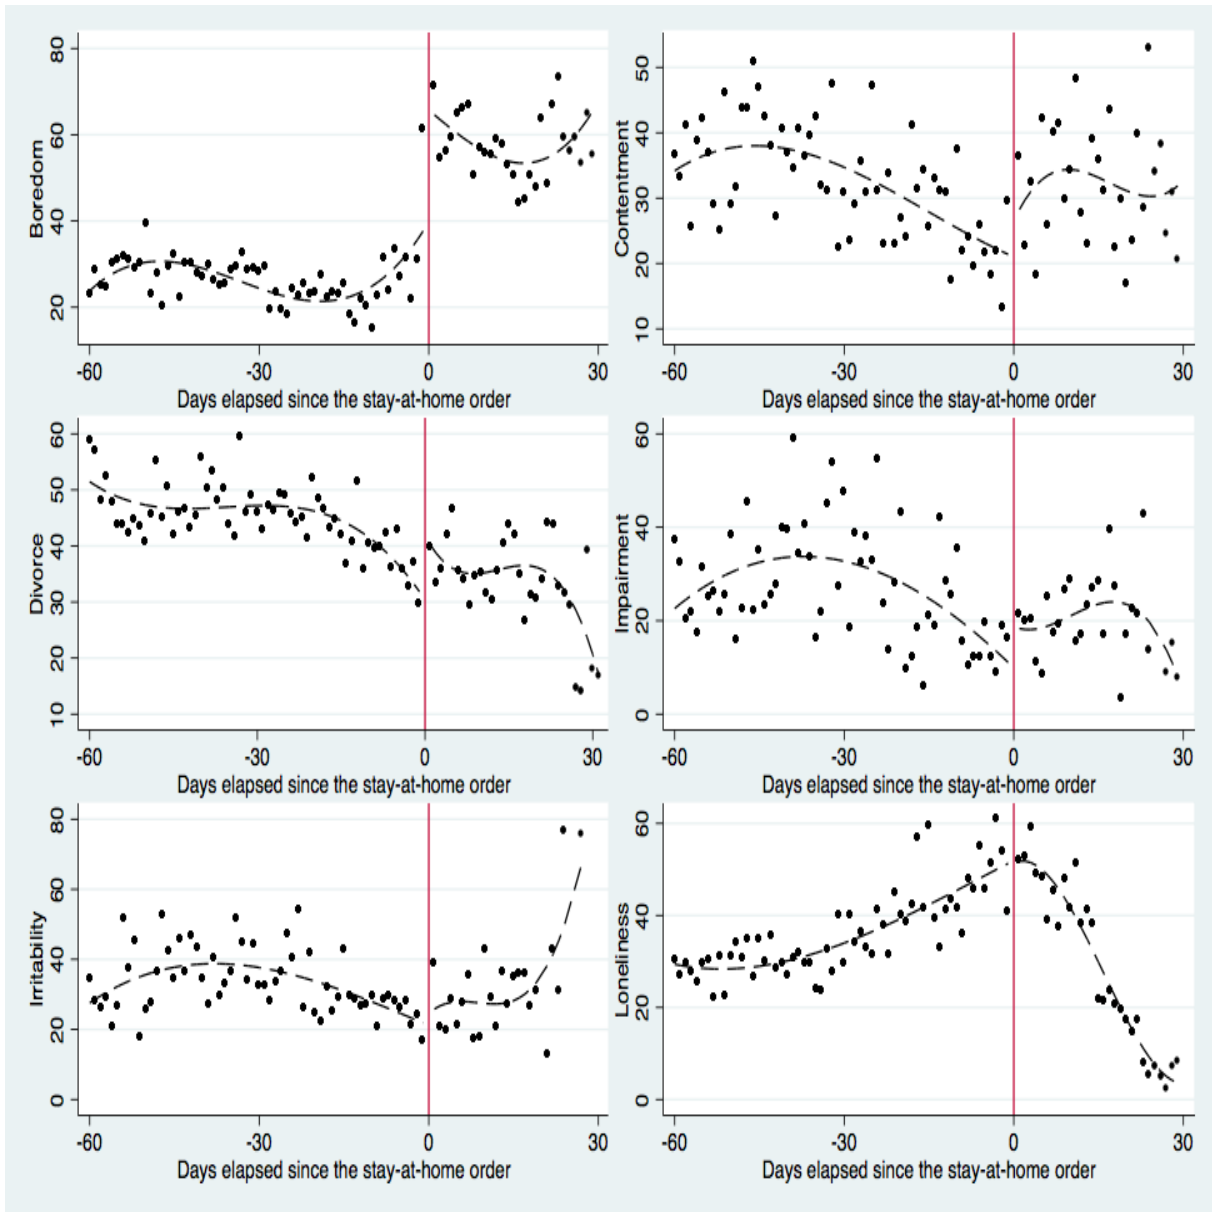

**Fig. A2 - Google Trends Before and After the Stay-at-Home Order (RDD 2020)**  
The vertical axis shows the scaled number of searches (on a scale from 0 to 100) each day before (negative values) and after (positive values) the stay-at-home order was announced (set equal to day zero) in 2020 (red dots) and the same date in 2019 (grey dots). The dots correspond to the raw averages by bins of one day for our nine European countries, weighted by the number of inhabitants per country. The dashed lines are fitted using a polynomial of order 3. The European countries included are: Austria, Belgium, France, Ireland, Italy, Luxembourg, Portugal, Spain and the UK.

## Western European Countries

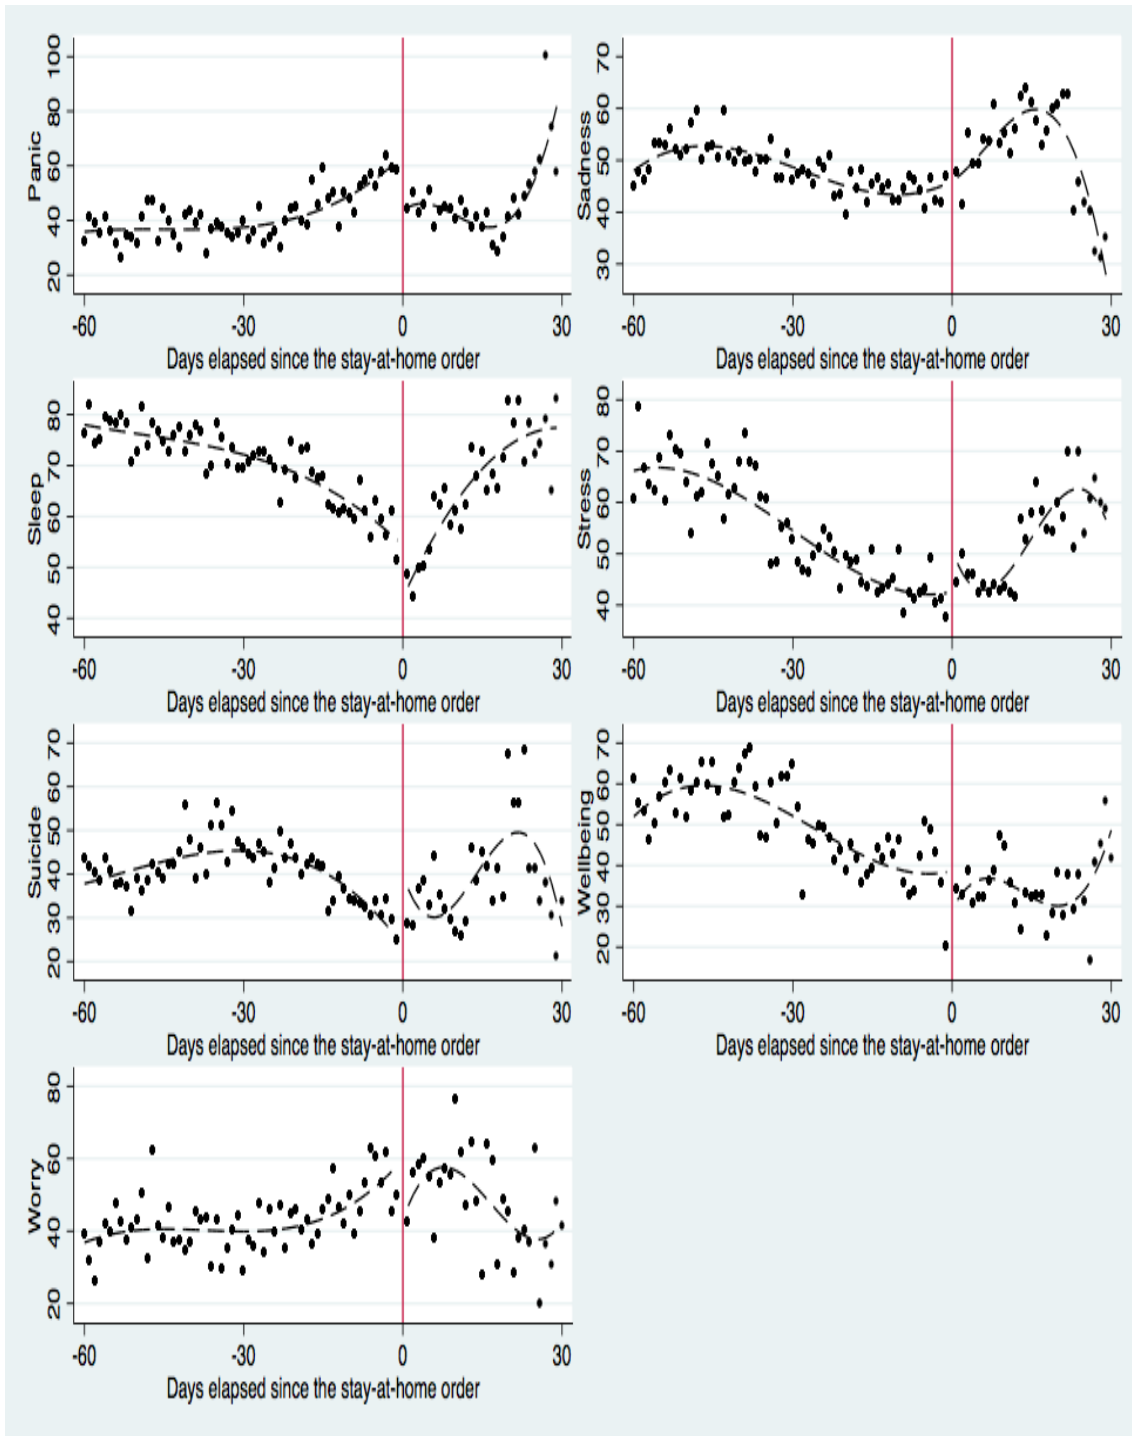

**Fig. A2 (cont.) - Google Trends Before and After the Stay-at-Home Order (RDD 2020)** The vertical axis shows the scaled number of searches (on a scale from 0 to 100) each day before (negative values) and after (positive values) the stay-at-home order was announced (set equal to day zero) in 2020 (red dots) and the same date in 2019 (grey dots). The dots correspond to the raw averages by bins of one day for our nine European countries, weighted by the number of inhabitants per country. The dashed lines are fitted using a polynomial of order 3. The European countries included are: Austria, Belgium, France, Ireland, Italy, Luxembourg, Portugal, Spain and the UK.

## United States

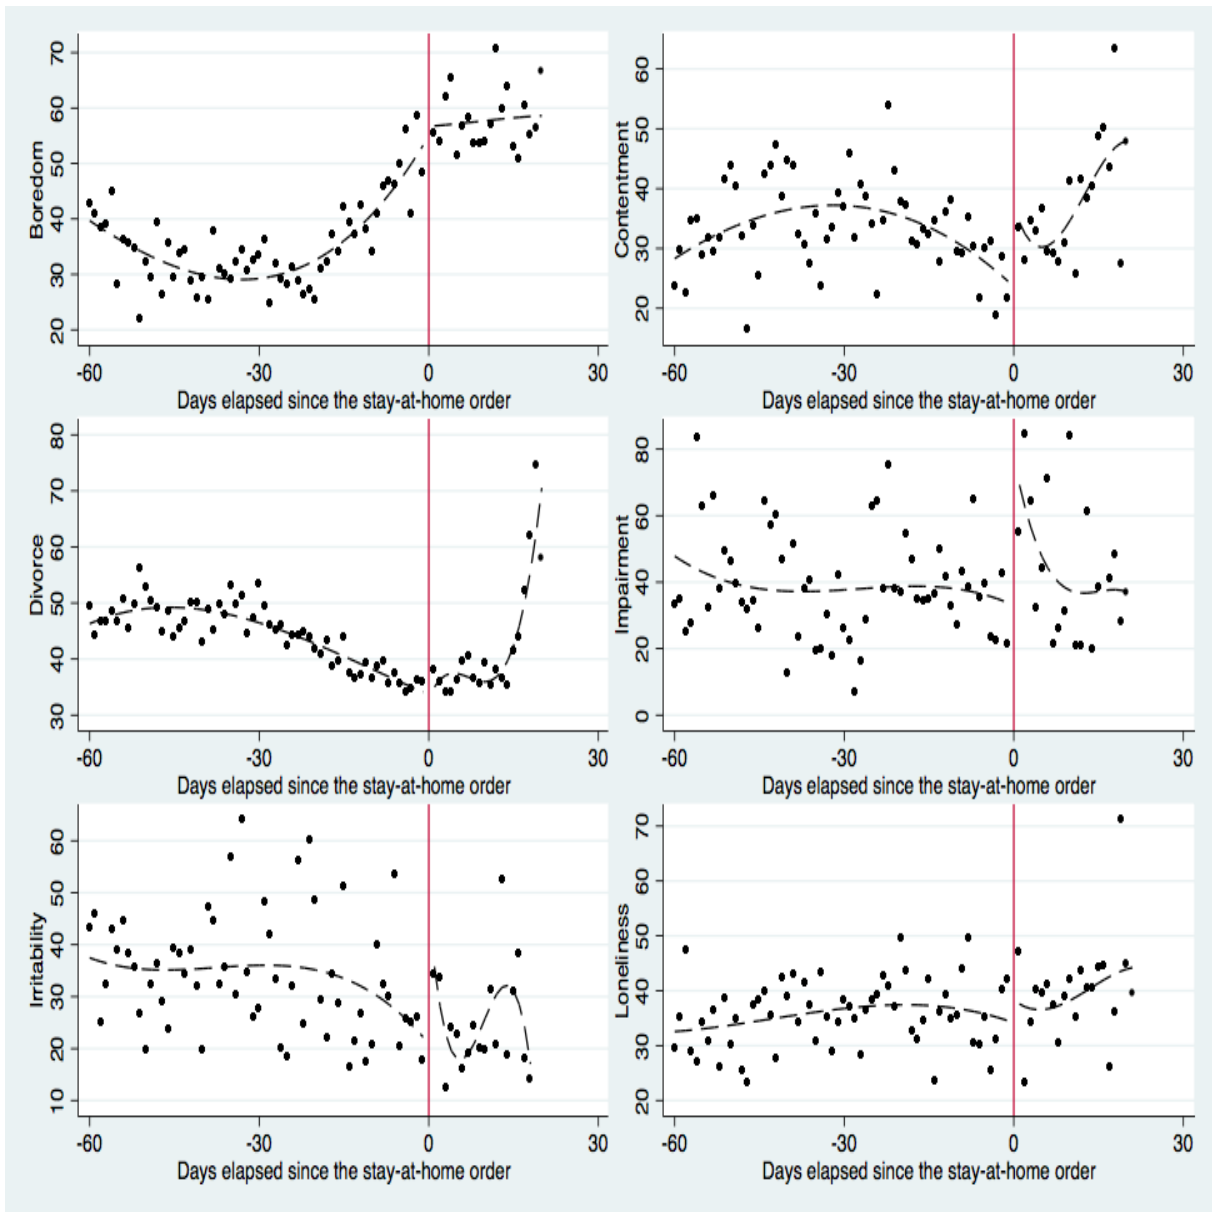

**Fig. A2 (cont.) - Google Trends Before and After the Stay-at-Home Order (RDD 2020)** The vertical axis shows the scaled number of searches (on a scale from 0 to 100) each day before (negative values) and after (positive values) the stay-at-home order was announced (set equal to day zero) in 2020 (red dots) and the same date in 2019 (grey dots). The dots correspond to the raw averages by bins of one day for 42 US States, weighted by the number of inhabitants per State. The eight US States without a lockdown are excluded from the analysis. The dashed lines are fitted using a polynomial of order 3.



## United States

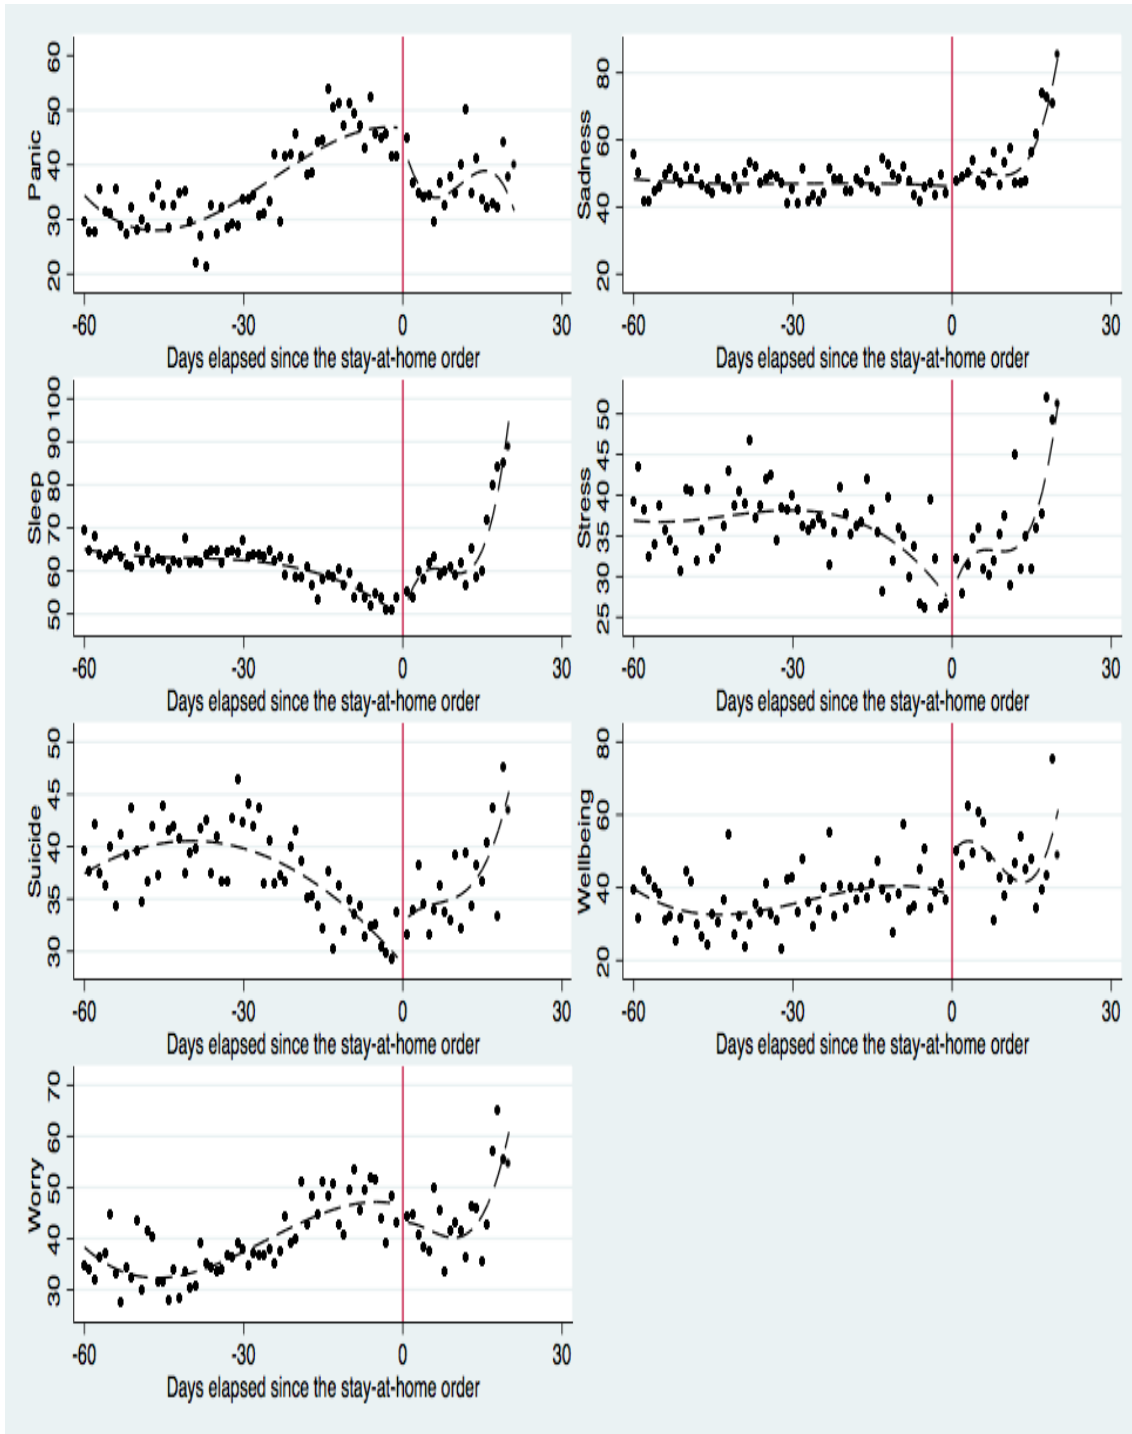

**Fig. A2 (cont.) - Google Trends Before and After the Stay-at-Home Order (RDD 2020)** The vertical axis shows the scaled number of searches (on a scale from 0 to 100) each day before (negative values) and after (positive values) the stay-at-home order was announced (set equal to day zero) in 2020 (red dots) and the same date in 2019 (grey dots). The dots correspond to the raw averages by bins of one day for 42 US States, weighted by the number of inhabitants per State. The eight US States without a lockdown are excluded from the analysis. The dashed lines are fitted using a polynomial of order 3.

## Western European Countries

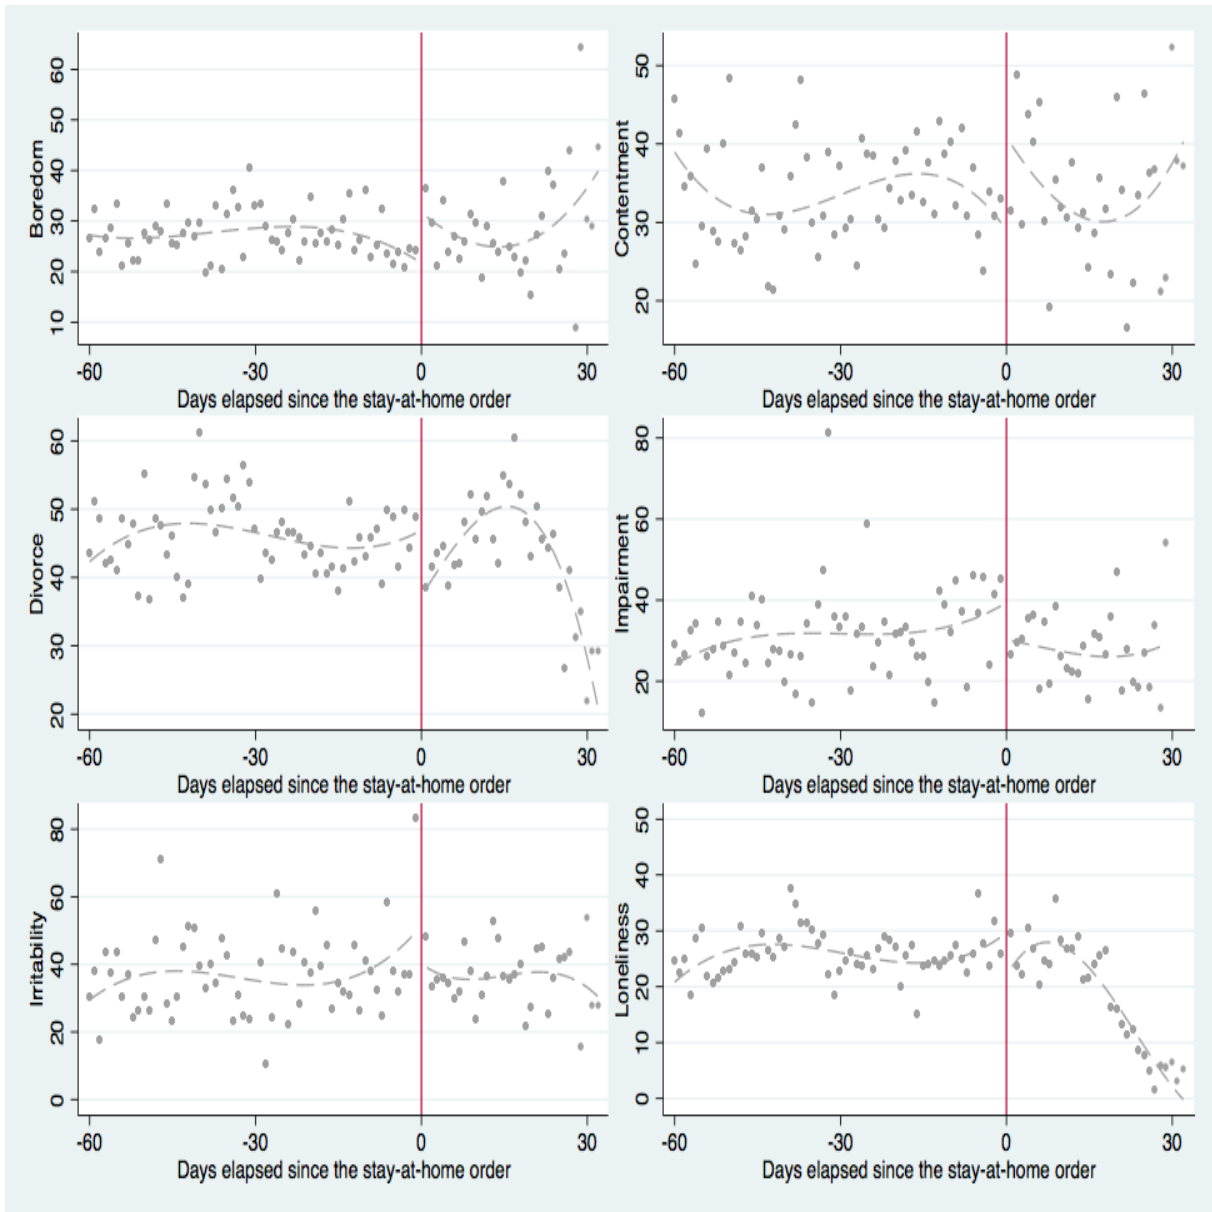

**Fig. A3 - Google Trends Before and After the Stay-at-Home Order (RDD 2019)**

The vertical axis shows the number of searches (on a scale from 0 to 100) in the days before (negative values) and after (positive values) the stay-at-home order (set equal to day zero) in 2020 for nine European countries. The dots correspond to the raw averages by bins of one day, weighted by the number of inhabitants per country. The dashed lines are fitted using a polynomial of order 3. The European countries included are: Austria, Belgium, France, Ireland, Italy, Luxembourg, Portugal, Spain and the UK.

## Western European Countries

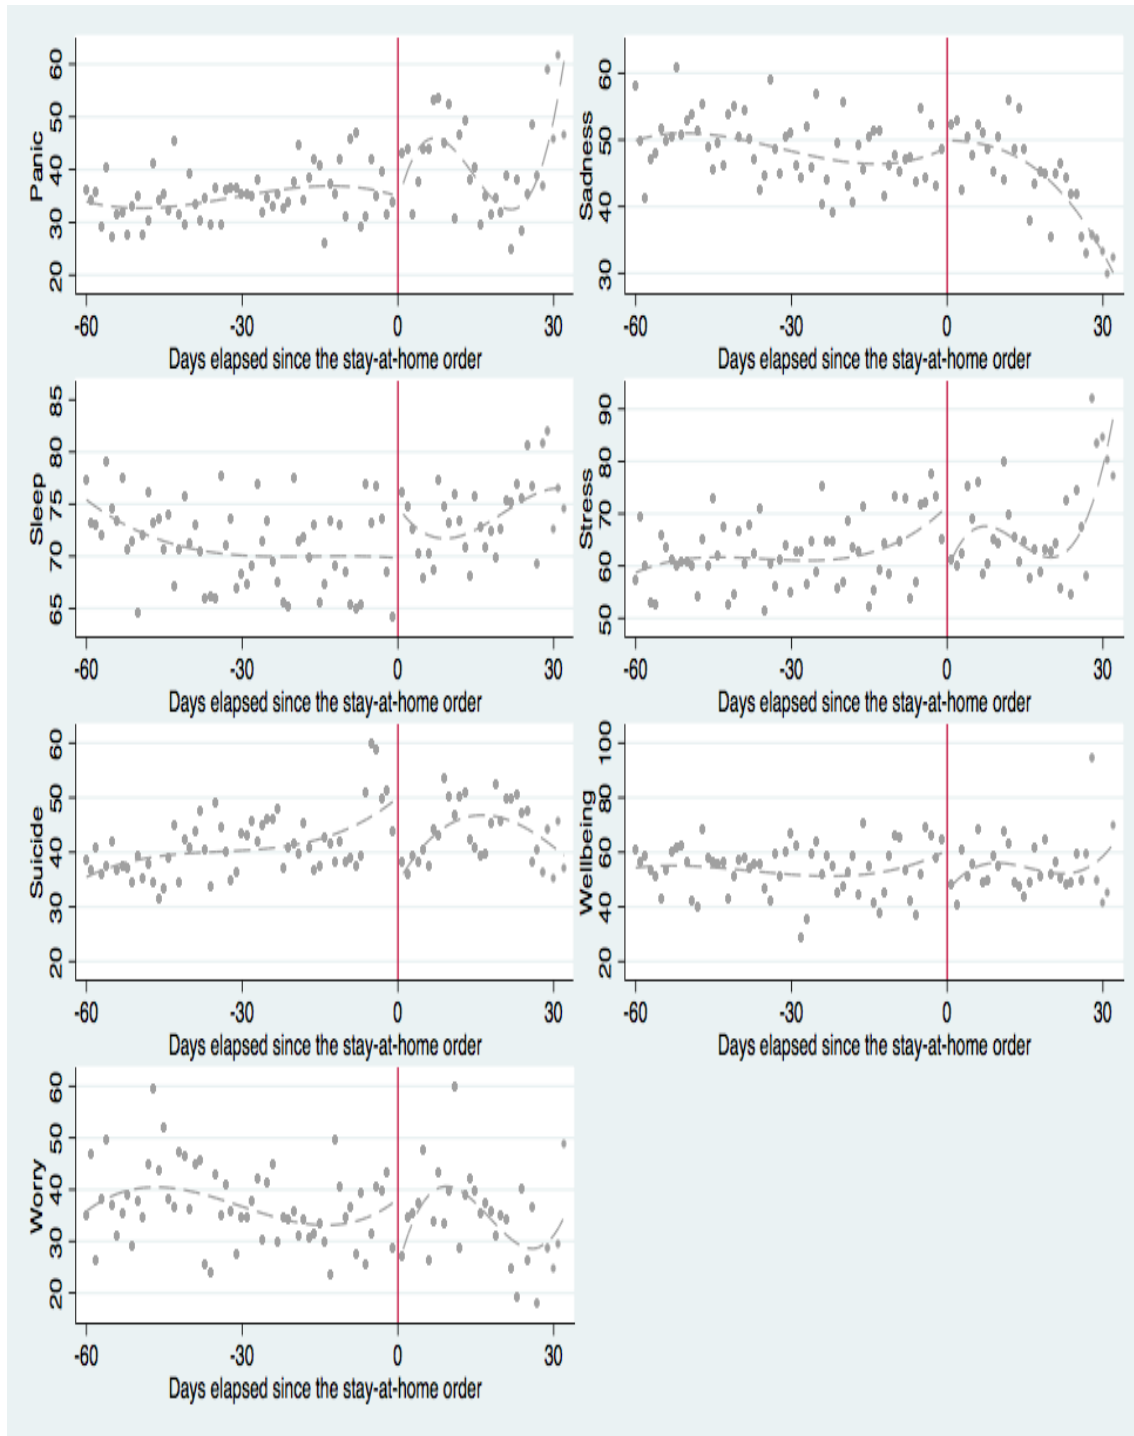

**Fig. A3 (cont.) - Google Trends Before and After the Stay-at-Home Order (RDD 2019)** The vertical axis shows the number of searches (on a scale from 0 to 100) in the days before (negative values) and after (positive values) the stay-at-home order (set equal to day zero) in 2020 for nine European countries. The dots correspond to the raw averages by bins of one day, weighted by the number of inhabitants per country. The dashed lines are fitted using a polynomial of order 3. The European countries included are: Austria, Belgium, France, Ireland, Italy, Luxembourg, Portugal, Spain and the UK.

## United States

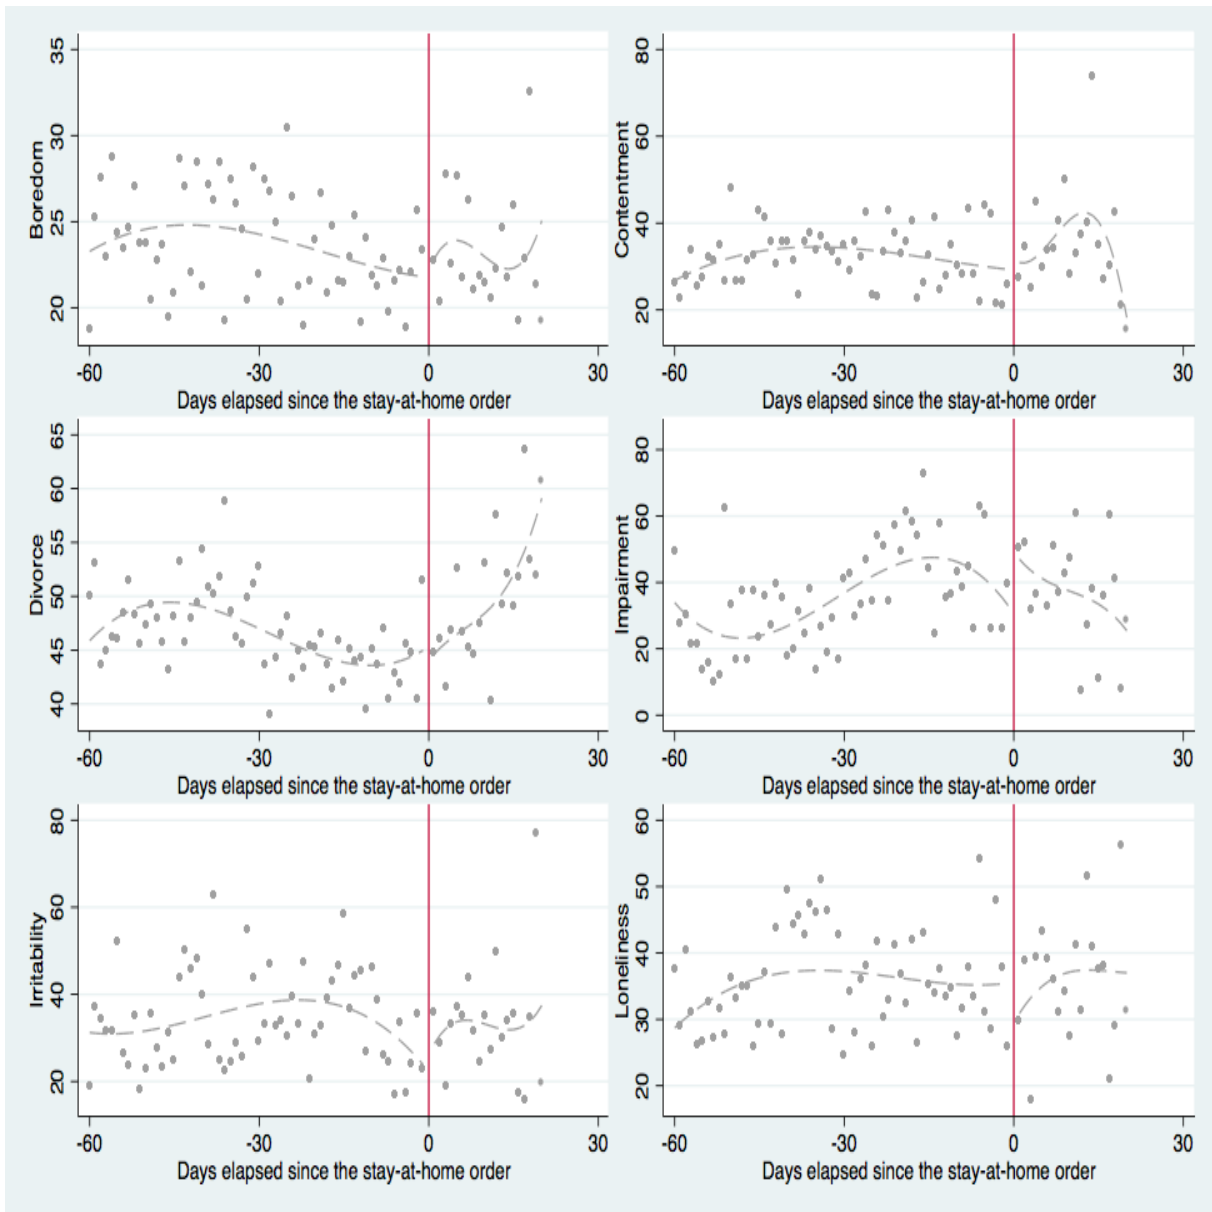

**Fig. A3 (cont.) - Google Trends Before and After the Stay-at-Home Order (RDD 2019)** The vertical axis shows the number of searches (on a scale from 0 to 100) in the days before (negative values) and after (positive values) the stay-at-home order (set equal to day zero) in 2020 for 42 US States. The eight US States without a lockdown are excluded from the analysis. The dots correspond to the raw averages by bins of one day, weighted by the number of inhabitants per State. The dashed lines are fitted using a polynomial of order 3.

## United States

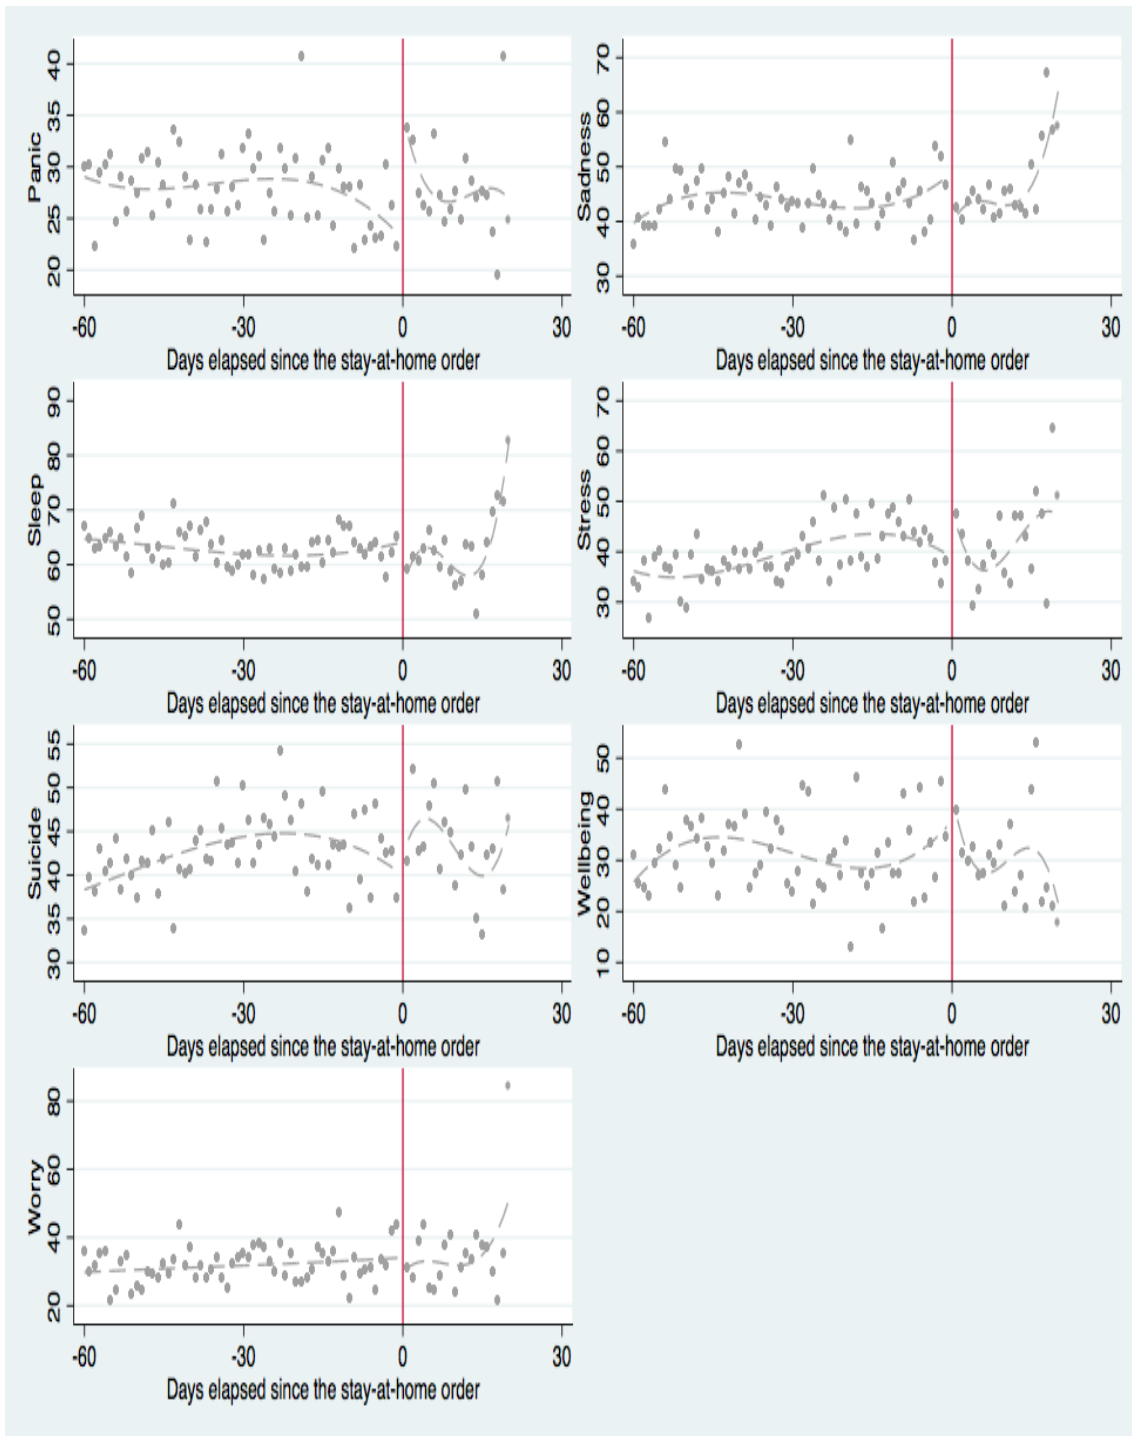

**Fig. A3 (cont.) - Google Trends Before and After the Stay-at-Home Order (RDD 2019)** The vertical axis shows the number of searches (on a scale from 0 to 100) in the days before (negative values) and after (positive values) the stay-at-home order (set equal to day zero) in 2020 for 42 US States. The eight US States without a lockdown are excluded from the analysis. The dots correspond to the raw averages by bins of one day, weighted by the number of inhabitants per State. The dashed lines are fitted using a polynomial of order 3.

## Western European Countries

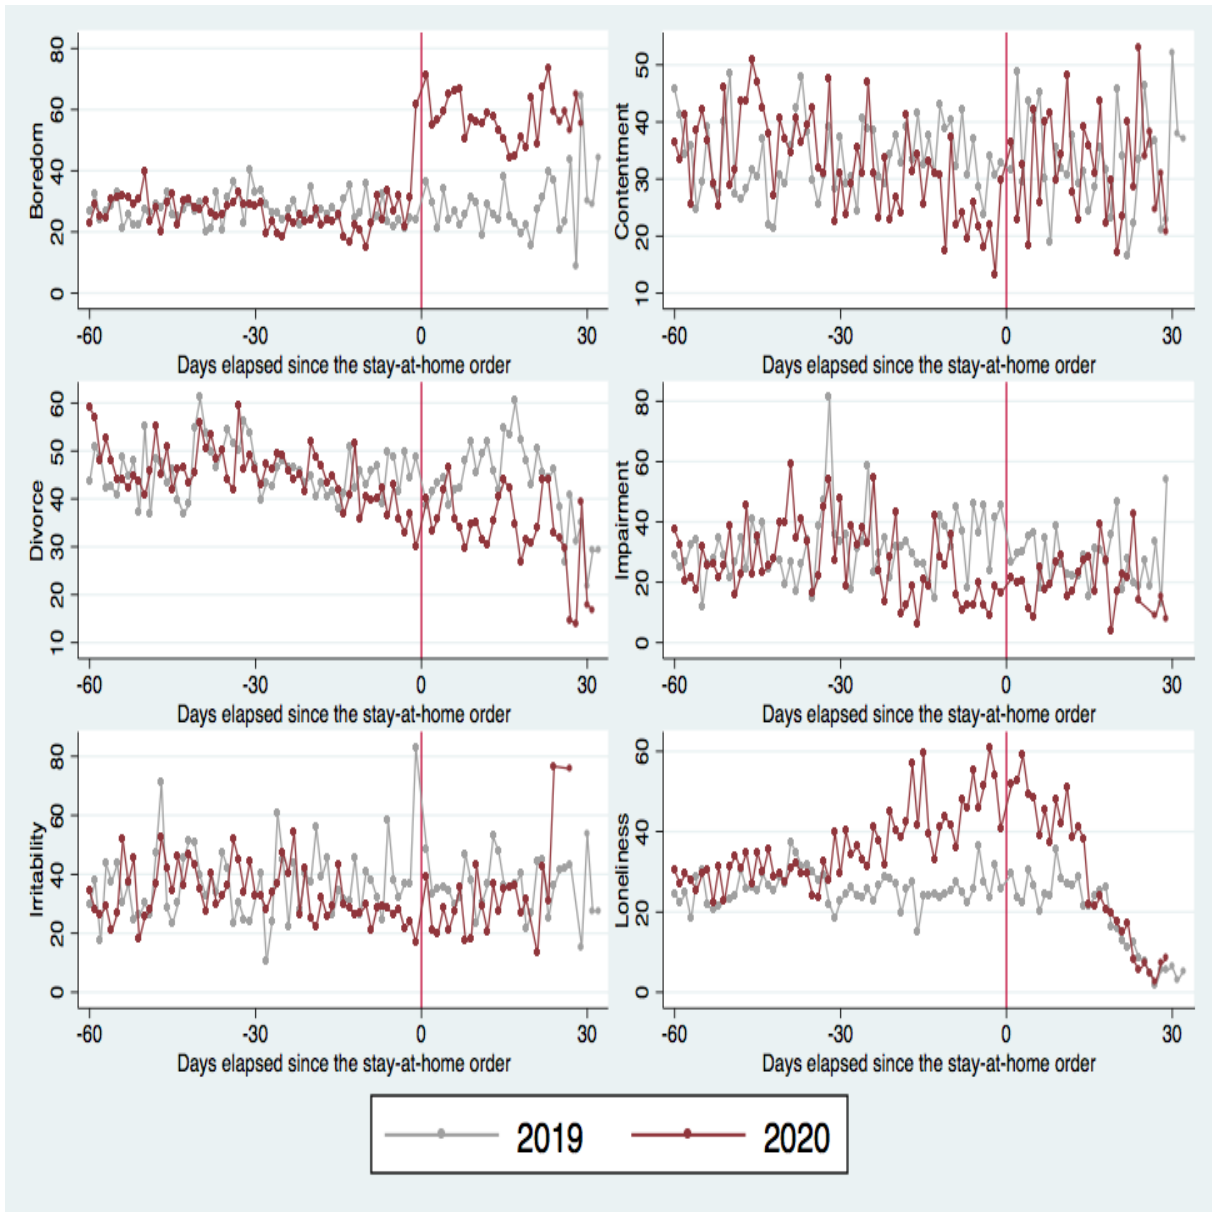

**Fig. A4 - Google Trends Before and After the Stay-at-Home Orders: All Topics**  
 The vertical axis shows the scaled number of searches (on a scale from 0 to 100) each day before (negative values) and after (positive values) the stay-at-home order was announced (set equal to day zero) in 2020 (red dots) and the same date in 2019 (grey dots). The dots correspond to the raw averages by bins of one day for our nine European countries, weighted by the number of inhabitants per country. The European countries included are: Austria, Belgium, France, Ireland, Italy, Luxembourg, Portugal, Spain and the UK

## Western European Countries

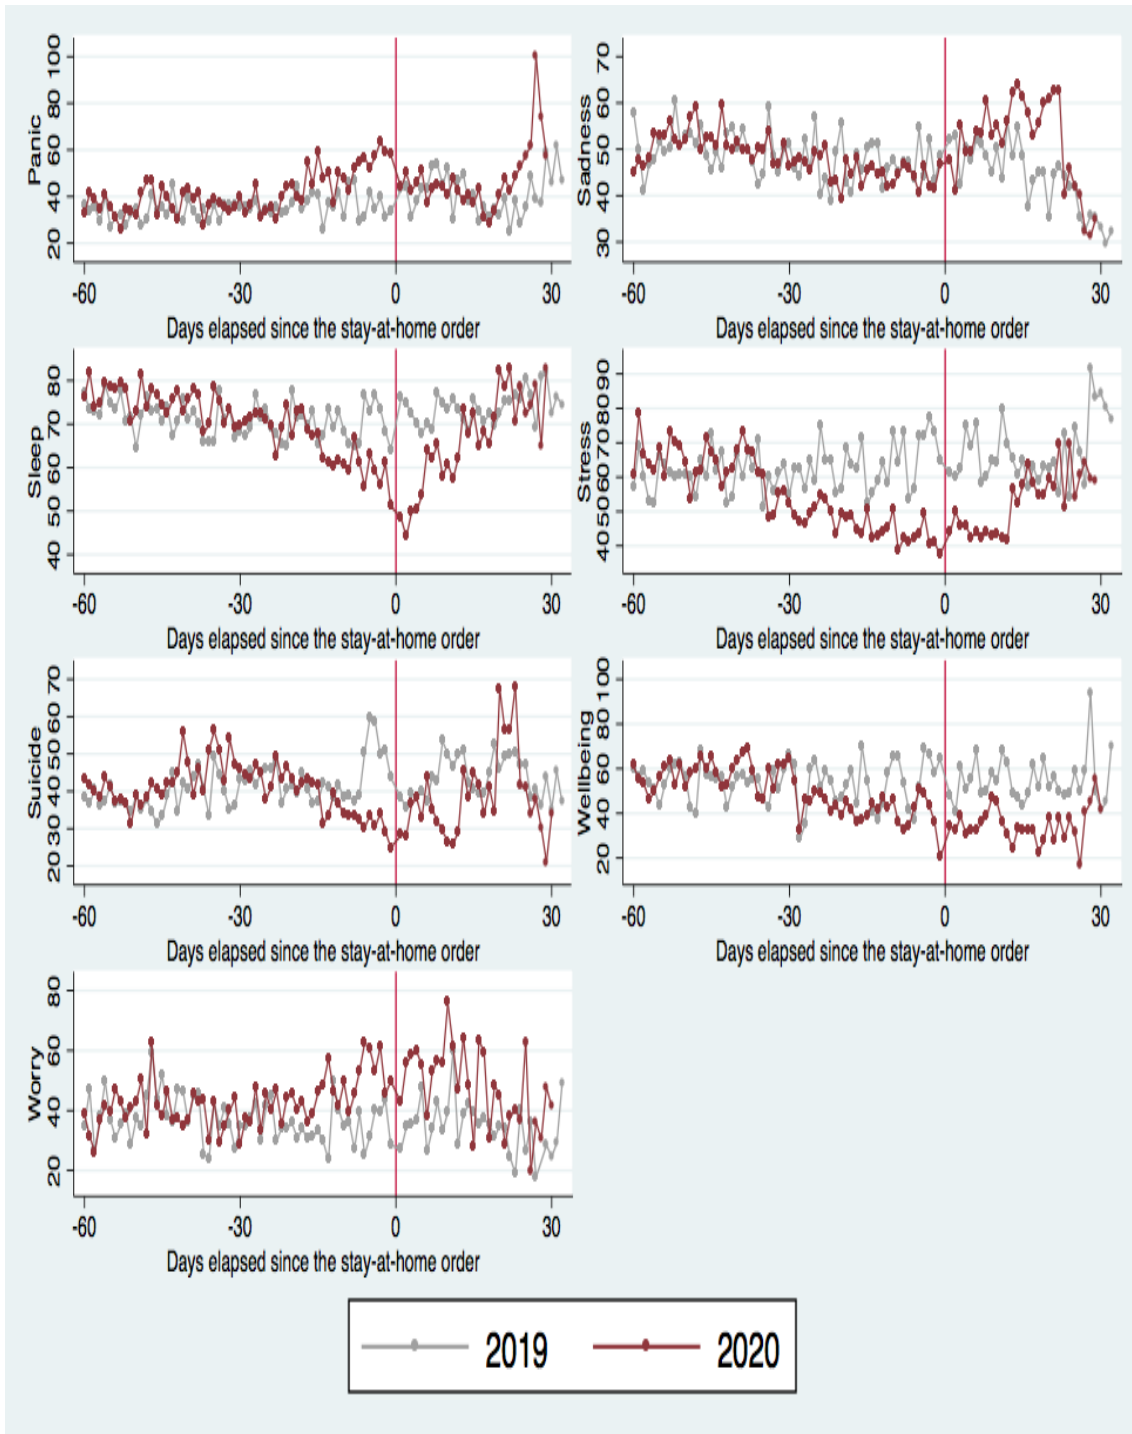

**Fig. A4 (cont.) - Google Trends Before and After the Stay-at-Home Orders: All Topics** The vertical axis shows the scaled number of searches (on a scale from 0 to 100) each day before (negative values) and after (positive values) the stay-at-home order was announced (set equal to day zero) in 2020 (red dots) and the same date in 2019 (grey dots). The dots correspond to the raw averages by bins of one day for our nine European countries, weighted by the number of inhabitants per country. The European countries included are: Austria, Belgium, France, Ireland, Italy, Luxembourg, Portugal, Spain, and the UK

## United States

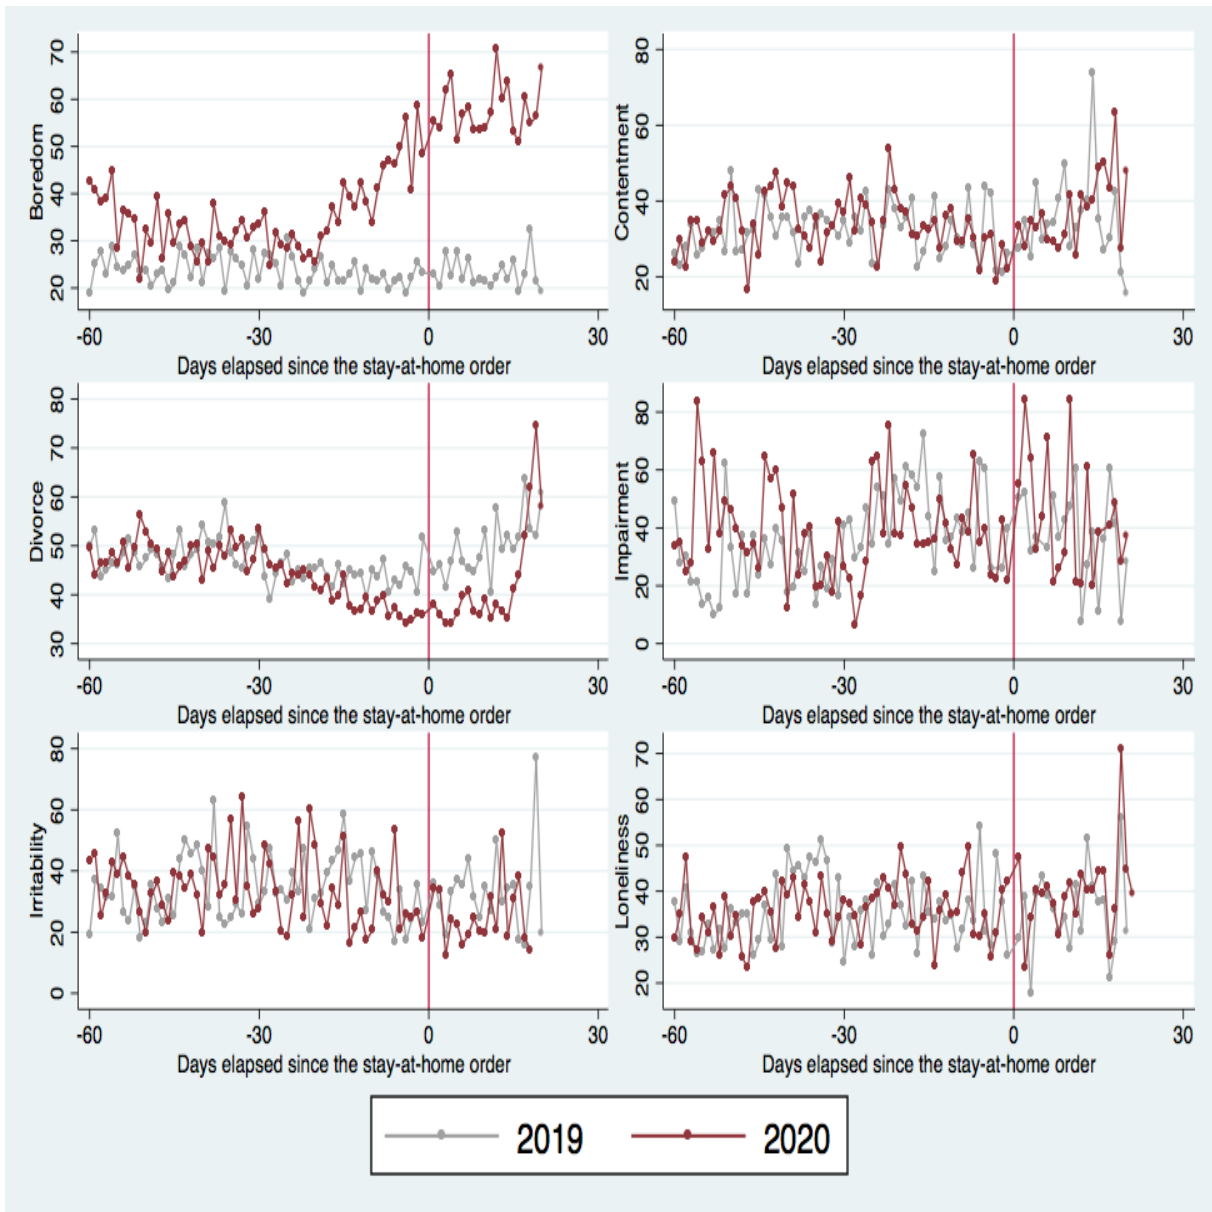

**Fig. A4(cont.) - Google Trends Before and After the Stay-at-Home Orders: All Topics** The vertical axis shows the scaled number of searches (on a scale from 0 to 100) each day before (negative values) and after (positive values) the stay-at-home order was announced (set equal to day zero) in 2020 (red dots) and the same date in 2019 (grey dots). The dots correspond to the raw averages by bins of one day for 42 US States, weighted by the number of inhabitants per State. The eight US States without a lockdown are excluded from the analysis.



## United States

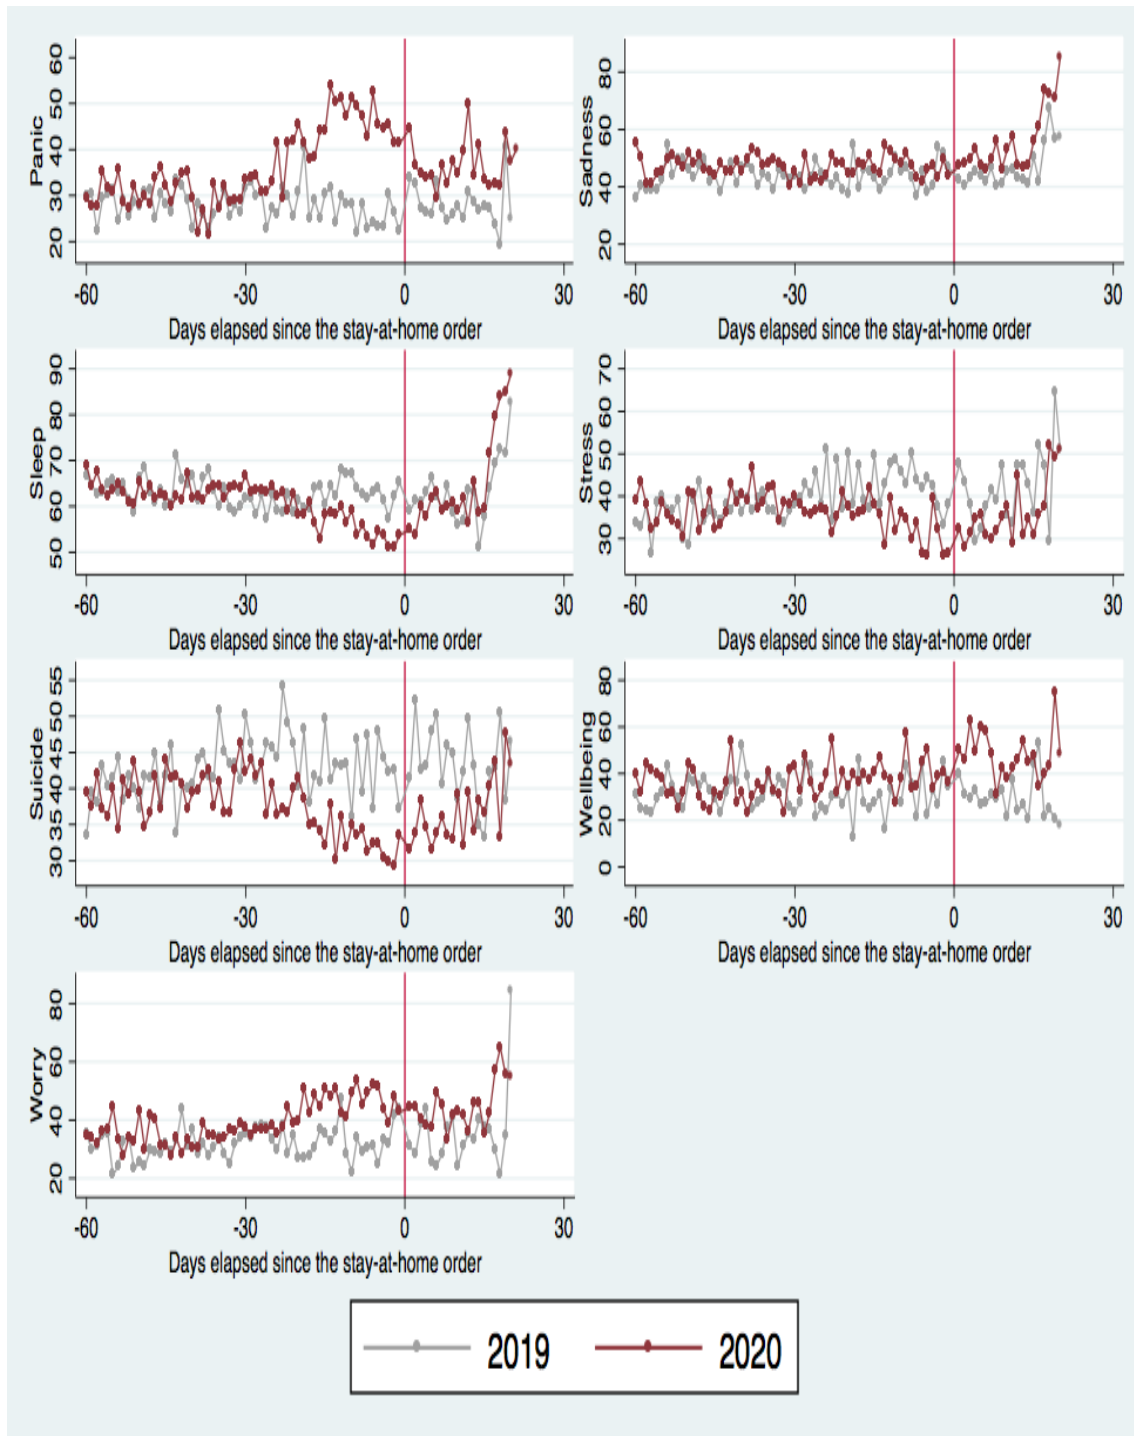

**Fig. A4 (cont.) - Google Trends Before and After the Stay-at-Home Orders: All Topics** The vertical axis shows the scaled number of searches (on a scale from 0 to 100) each day before (negative values) and after (positive values) the stay-at-home order was announced (set equal to day zero) in 2020 (red dots) and the same date in 2019 (grey dots). The dots correspond to the raw averages by bins of one day for 42 US States, weighted by the number of inhabitants per State. The eight US States without a lockdown are excluded from the analysis.

## Western European Countries

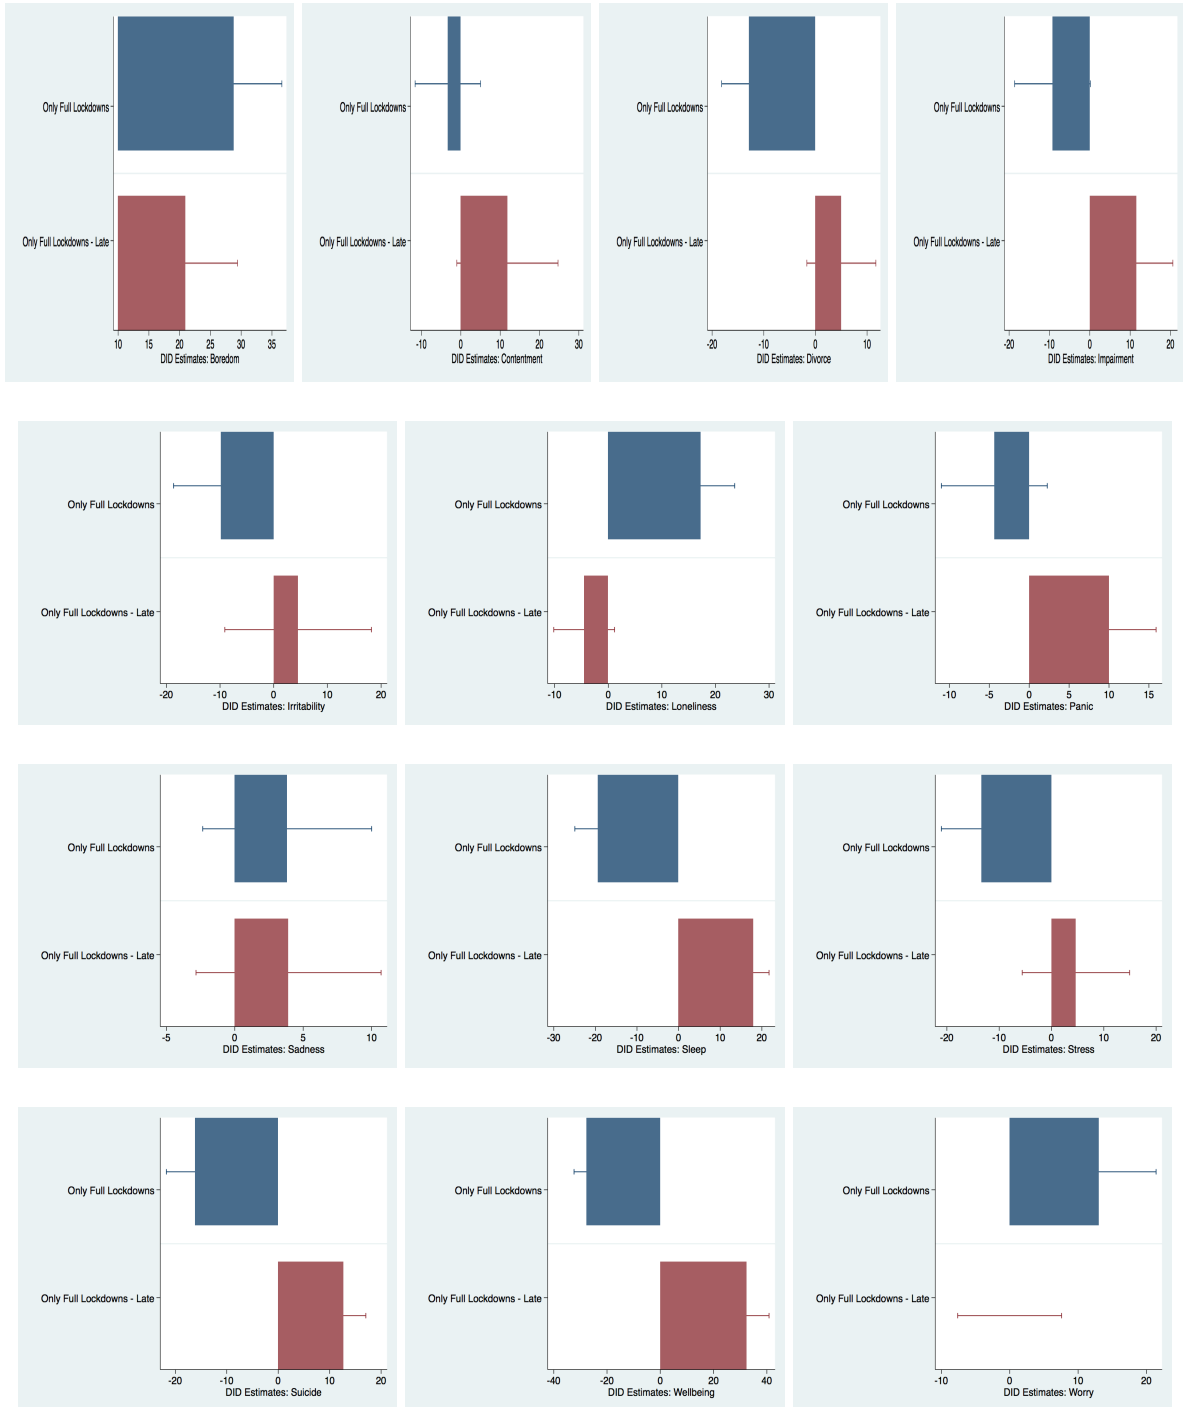

**Fig. A5 - Late Lockdown - Western Europe Countries: All Topics** The blue bars show the difference-in-difference estimates for the effect of the lockdown in the nine European countries. The red bars show the additional difference-in-difference estimates for the effect of lockdown in the 3 European countries that implemented the lockdown later (i.e. Ireland, Portugal and the United Kingdom).

## Western European Countries

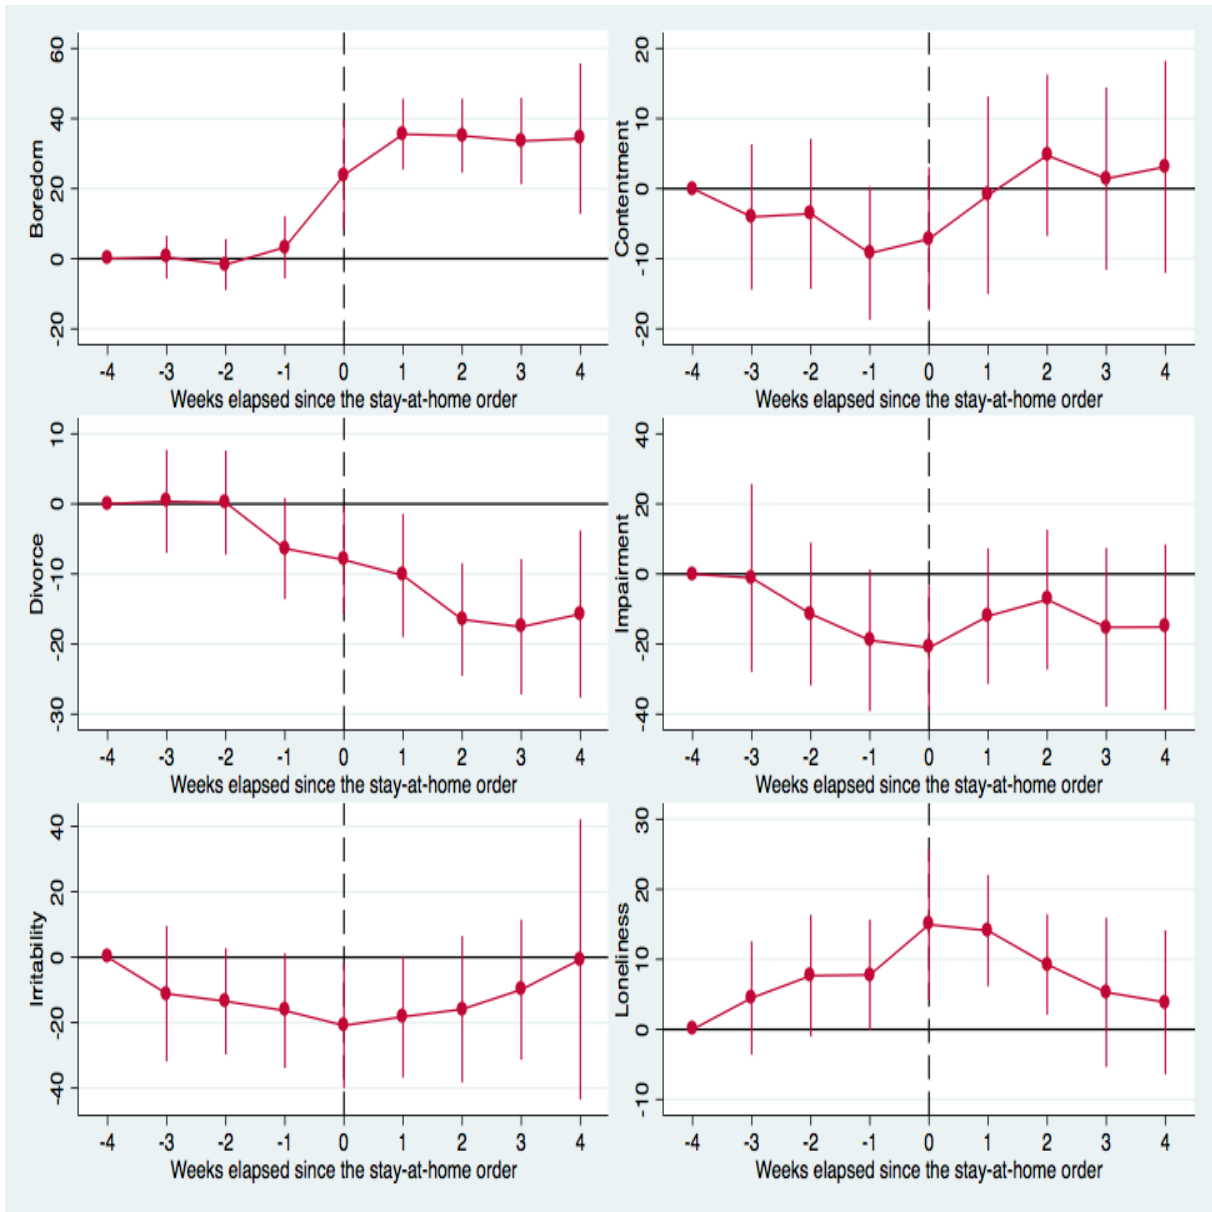

**Fig. A6 - Duration of the Effects of the Stay-at-Home Orders: All Topics** The vertical axis shows the event-study differences-in-differences estimates using the 2019 period as a counterfactual. The 4th week before the stay-at-home-order (in 2019 or 2020) is the reference period. The models include dummies for the weeks before and after the stay-at-home order. Controls: country, year, week, day of the week fixed effects as well as the one-day lagged number of new deaths from Covid-19 per million. Weights are applied. Robust standard errors are plotted. Standard errors are clustered at the day level.

## Western European Countries

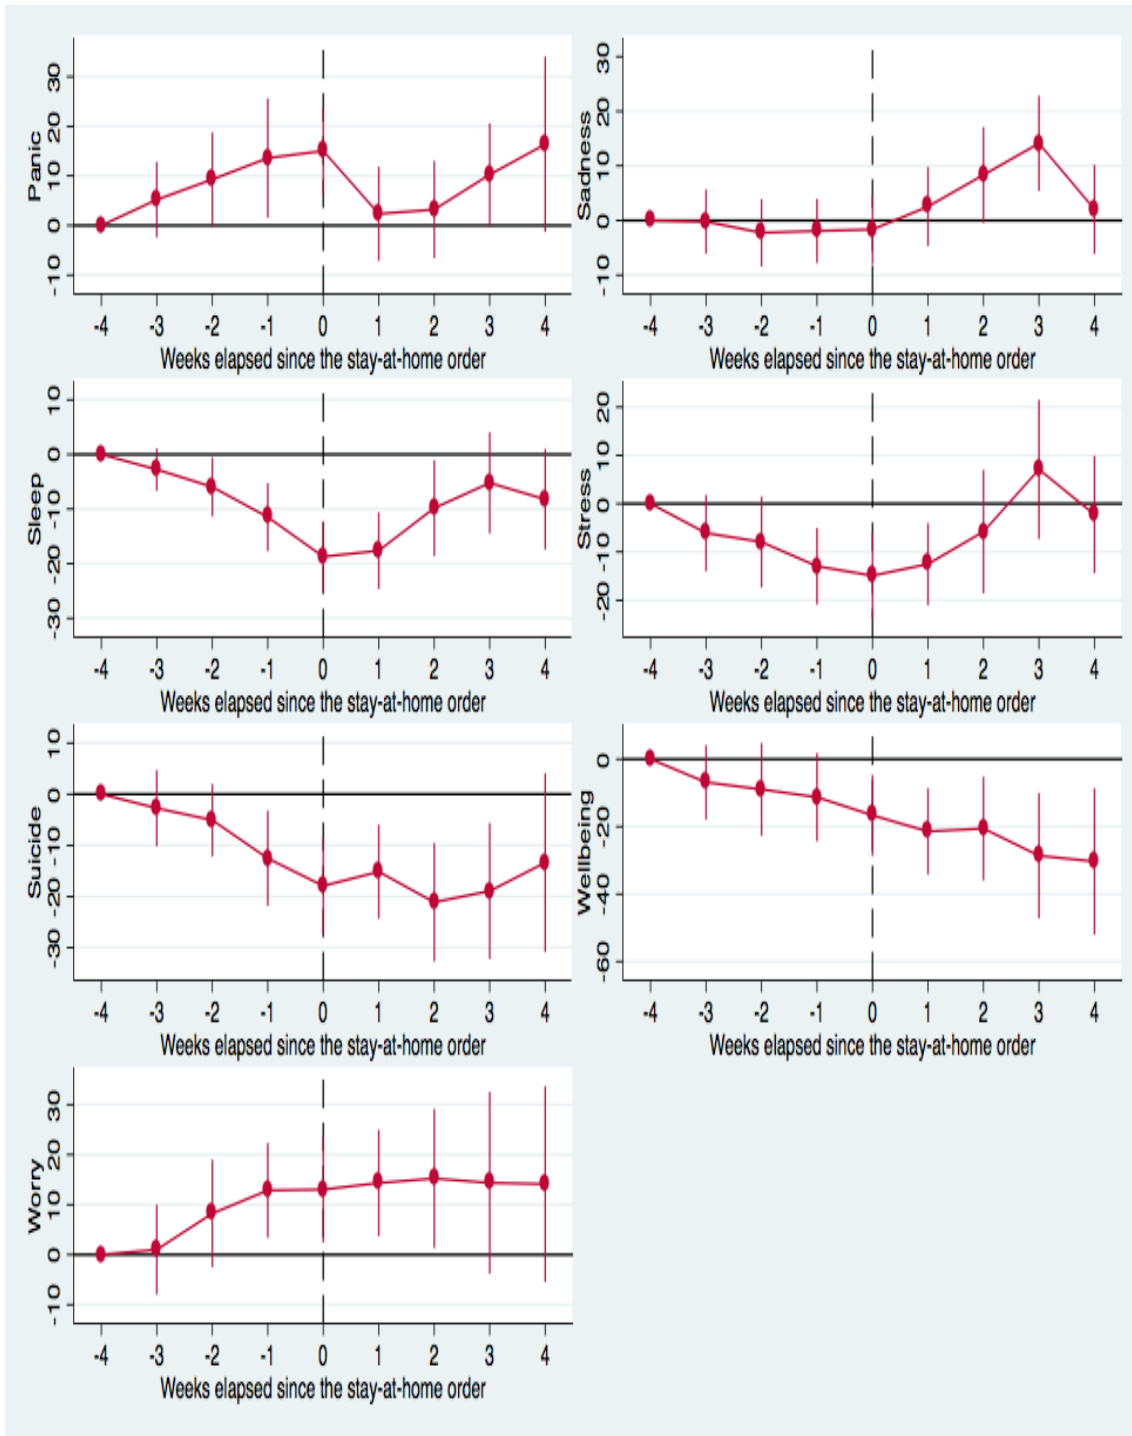

**Fig. A6 (cont.) - Duration of the Effects of the Stay-at-Home Orders: All Topics**  
 The vertical axis shows the event-study differences-in-differences estimates using the 2019 period as a counterfactual. The 4th week before the stay-at-home-order (in 2019 or 2020) is the reference period. The models include dummies for the weeks before and after the stay-at-home order. Controls: country, year, week, day of the week fixed effects as well as the one-day lagged number of new deaths from Covid-19 per million. Weights are applied. Robust standard errors are plotted. Standard errors are clustered at the day level.

## United States

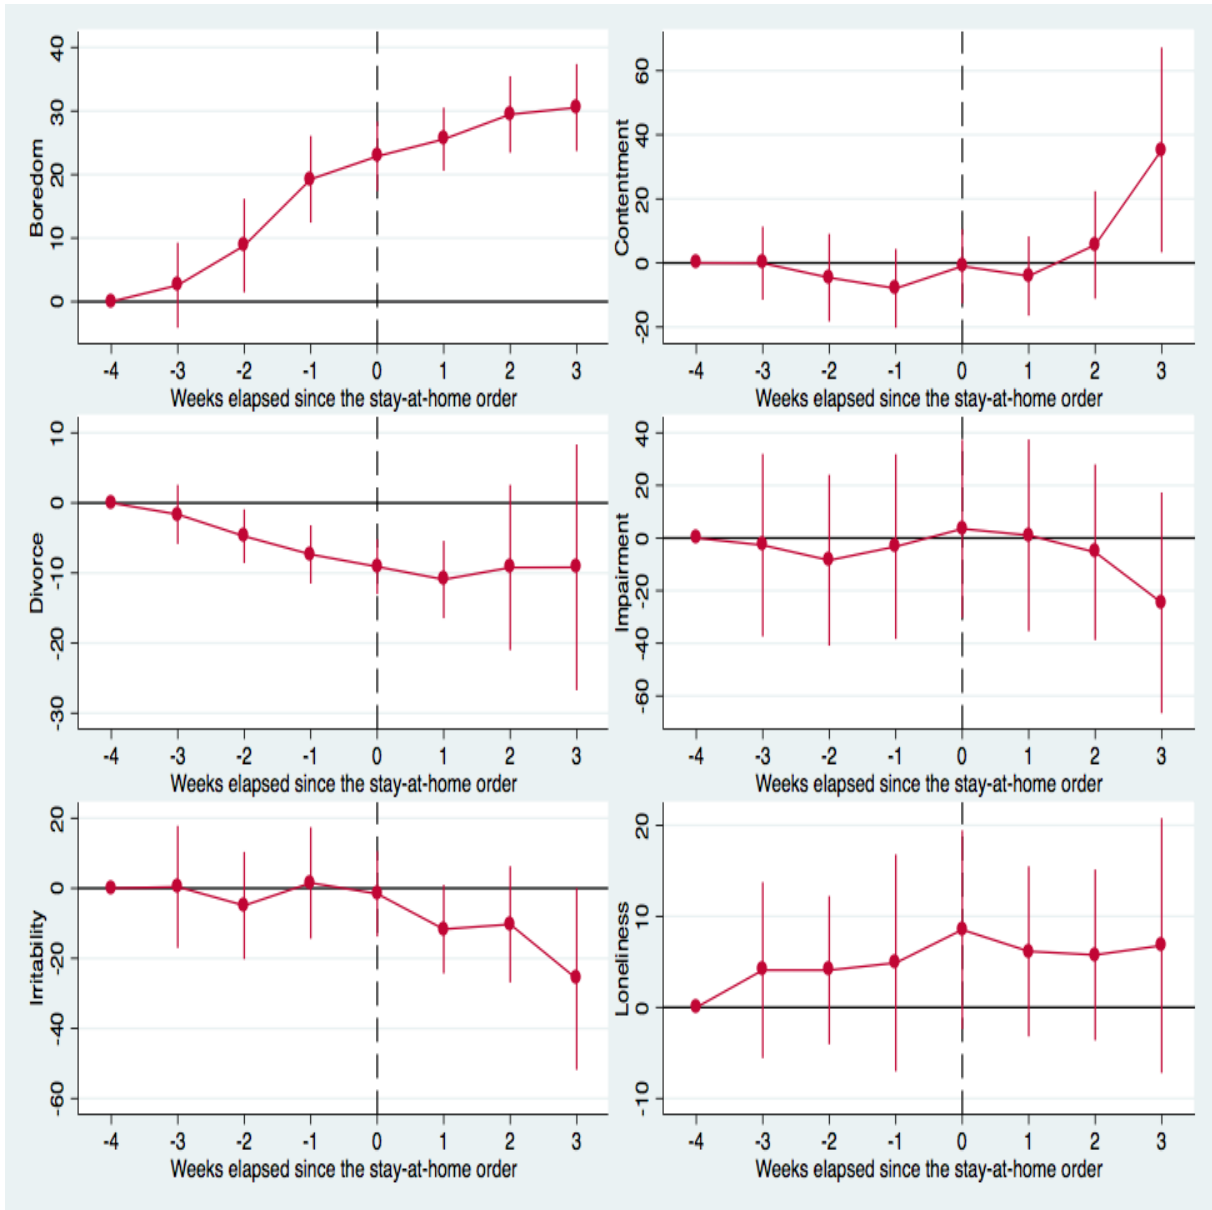

**Fig. A6 (cont.) - Duration of the Effects of the Stay-at-Home Orders: All Topics**

The vertical axis shows the event-study differences-in-differences estimates using the 2019 period as a counterfactual. The 4th week before the stay-at-home-order (in 2019 or 2020) is the reference period. The models include dummies for the weeks before and after the stay-at-home order. Controls: State, year, week, day of the week fixed effects as well as the one-day lagged number of new deaths from Covid-19 per million. Weights are applied. Robust standard errors are plotted. Standard errors are clustered at the day level.

## United States

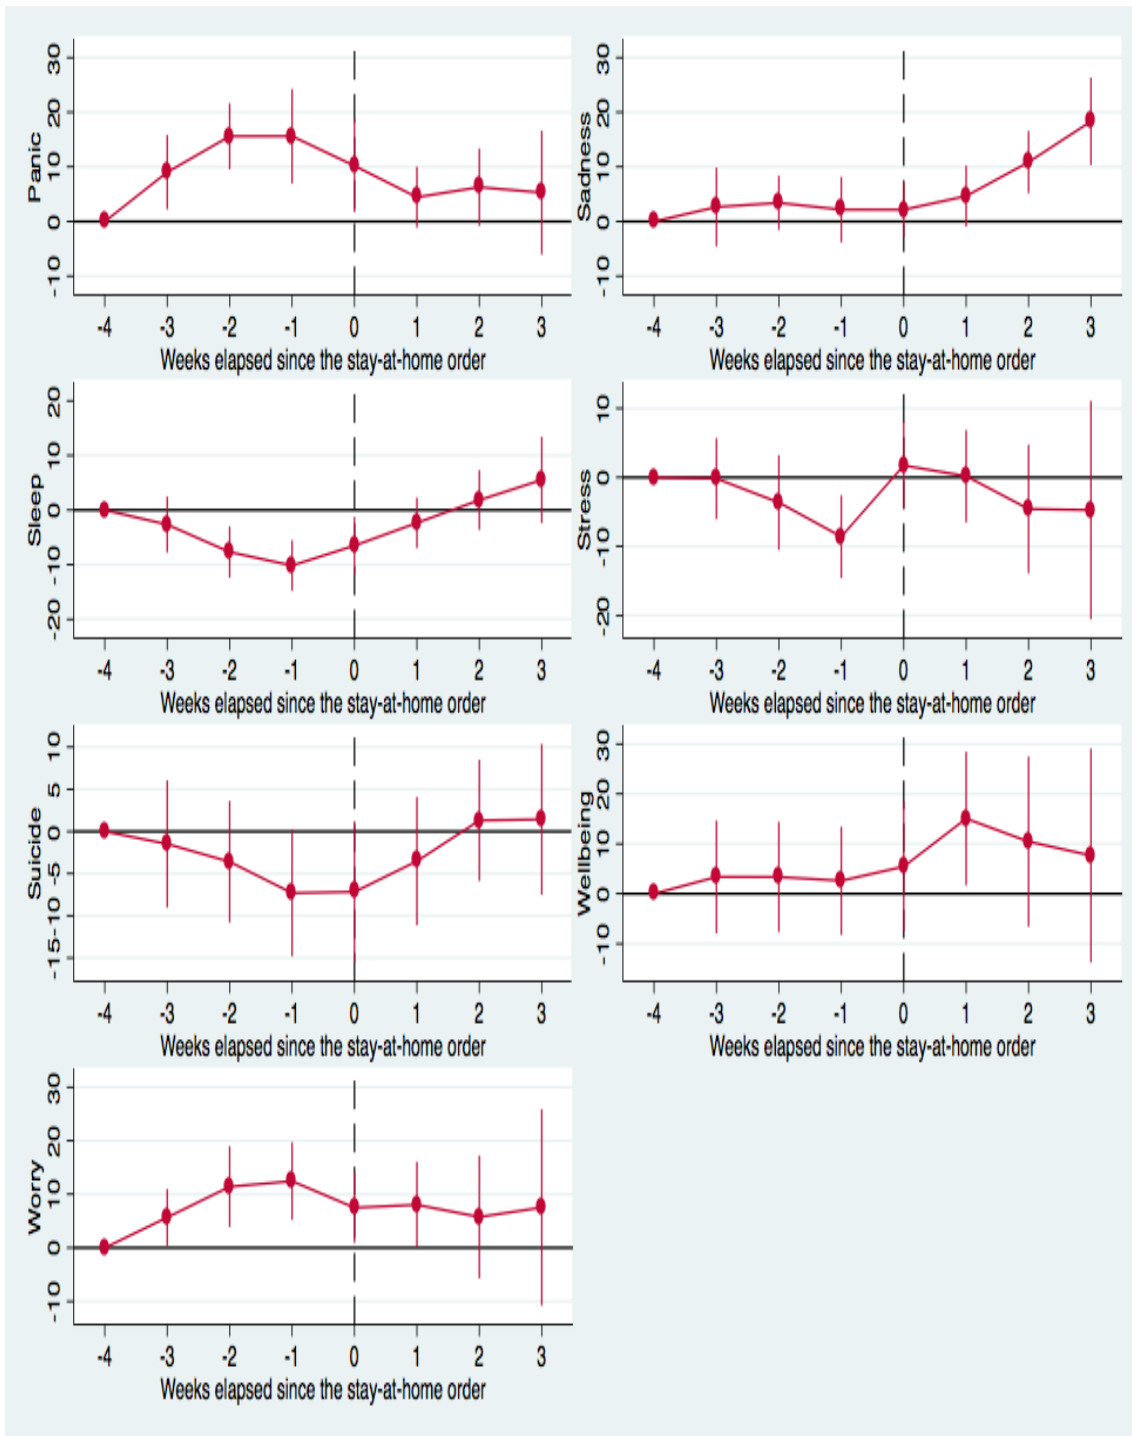

**Fig. A6 (cont.) - Duration of the Effects of the Stay-at-Home Orders: All Topics**

The vertical axis shows event-study differences-in-differences estimates using the 2019 period as a counterfactual. The 4th week before the stay-at-home-order (in 2019 or 2020) is the reference period. The models include dummies for the weeks before and after the stay-at-home order. Controls: State, year, week, day of the week fixed effects as well as the lagged number of new deaths from covid-19 per day per million. Weight applied. Robust standard errors are plotted. Standard errors are clustered at the day level.

## Western European Countries

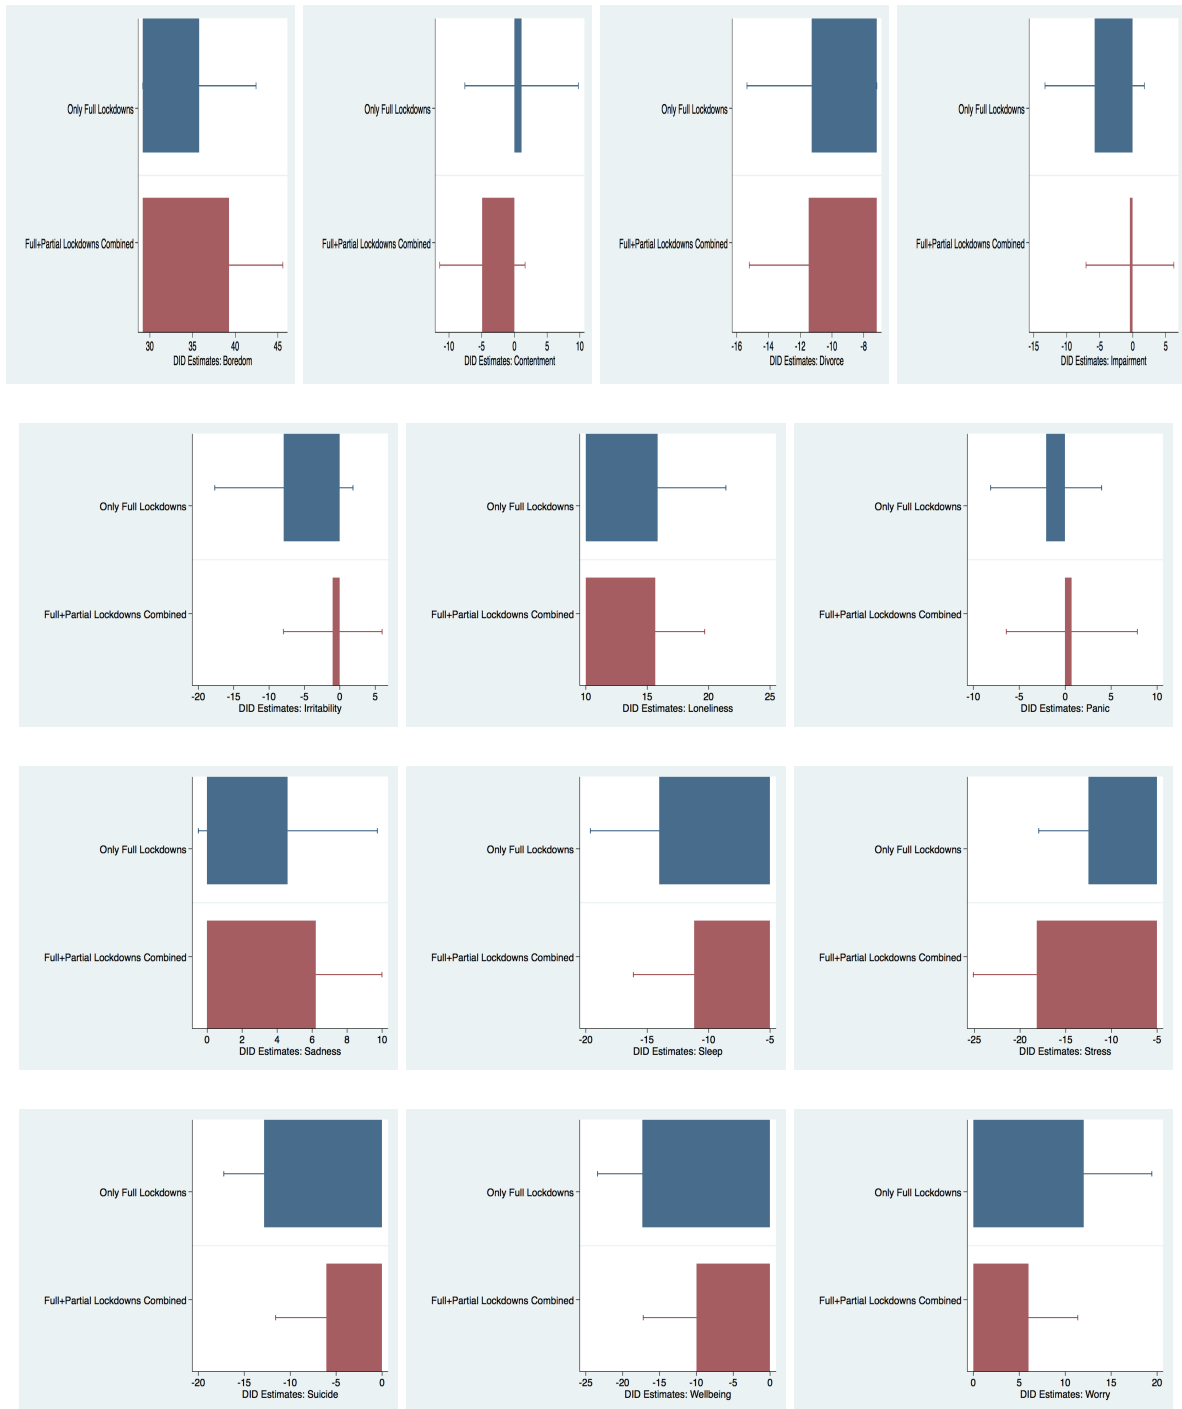

**Fig. A7 - Full versus Partial Lockdown** The blue bars show the difference-in-difference estimates for the effect of the lockdown in the nine European countries which implemented full lockdown. The red bars show the difference-in-difference estimates for the effect of lockdown in countries where any lockdown (i.e. full or partial) took place. The latter group includes 12 European countries: Austria, Belgium, France, Germany, Ireland, Italy, Luxembourg, Netherlands, Portugal, Spain, Switzerland and the UK.

## United States

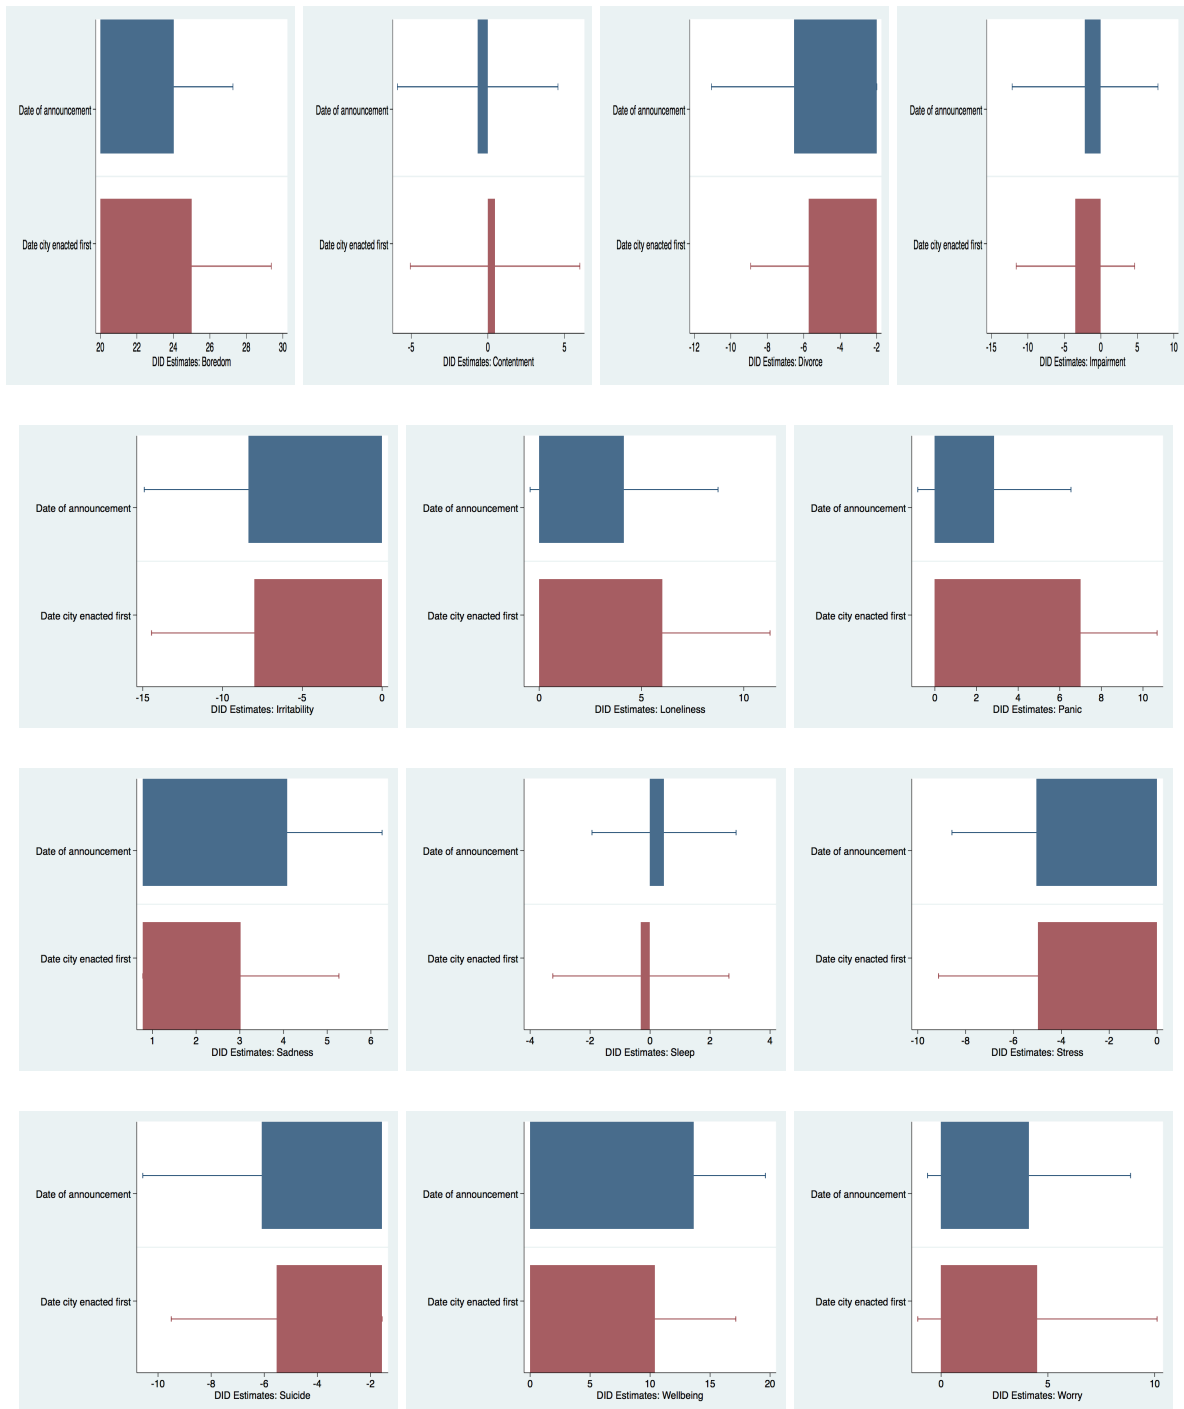

**Fig. A8 - Date Announced versus City/County First Enacted** The blue bars show the difference-in-difference estimates for the effect of the lockdown where the date of announcement of the State-imposed lockdown is considered. The red bars show the difference-in-difference estimates for the effect of lockdown where the date of implementation of the lockdown in the first city/county in the State is taken instead.
